1 **Phosphorylation-Dependent Assembly of a 14-3-3 Mediated Signaling Complex During Red**  
2 **Blood Cell Invasion by *Plasmodium falciparum* Merozoites**

3  
4 Kunal R. More<sup>a</sup>, Inderjeet Kaur<sup>b</sup>, Quentin Gai Gianetto<sup>c,d</sup>, Brandon M. Invergo<sup>e,f</sup>, Thibault Chaze<sup>c</sup>,  
5 Ravi Jain<sup>g</sup>, Christéle Huon<sup>a</sup>, Petra Gutenbrunner<sup>f</sup>, Hendrik Weisser<sup>f</sup>, Mariette Matondo<sup>c</sup>, Jyoti S.  
6 Choudhary<sup>f</sup>, Gordon Langsley<sup>h</sup>, Shailja Singh<sup>a,g\*</sup> and Chetan E. Chitnis<sup>a,b\*</sup>

7  
8 <sup>a</sup>Malaria Parasite Biology and Vaccines Unit, Department of Parasites and Insect Vectors, Institut  
9 Pasteur, Paris, France

10 <sup>b</sup>International Centre for Genetic Engineering and Biotechnology (ICGEB), New Delhi, India

11 <sup>c</sup>Proteomics Platform, Mass Spectrometry for Biology Unit, USR CNRS 2000, Institut Pasteur, Paris,  
12 France

13 <sup>d</sup>Bioinformatics and Biostatistics HUB, Computational Biology Department, USR CNRS 3756, Institut  
14 Pasteur, Paris, France

15 <sup>e</sup>EMBL-European Bioinformatics Institute, Wellcome Genome Campus, Hinxton, UK

16 <sup>f</sup> Proteomic Mass Spectrometry Group, Wellcome Trust Sanger Institute, Hinxton, UK

17 <sup>g</sup>Special Centre for Molecular Medicine, Jawaharlal Nehru University, New Delhi, India

18 <sup>h</sup>Institut Cochin, Inserm U1016, Paris, France

19

20 Running title: Signaling complex during merozoite invasion

21

22

23 Abstract: 232 words; Text: 5494 words

24

25

26 \*Address correspondence to: Chetan E. Chitnis, [chetan.chitnis@pasteur.fr](mailto:chetan.chitnis@pasteur.fr); or Shailja Singh,  
27 [shailjasngh@gmail.com](mailto:shailjasngh@gmail.com)

28

29 **Abstract**

30 Red blood cell (RBC) invasion by *Plasmodium* merozoites requires multiple steps that are regulated by  
31 signaling pathways. Exposure of *P. falciparum* merozoites to the physiological signal of low  $K^+$ , as  
32 found in blood plasma, leads to a rise in cytosolic  $Ca^{2+}$ , which mediates microneme secretion, motility,  
33 and invasion. We have used global phosphoproteomic analysis of merozoites to identify signaling  
34 pathways that are activated during invasion. Using quantitative phosphoproteomics we found 394  
35 protein phosphorylation site changes in merozoites subjected to different ionic environments  
36 (high  $K^+$ /low  $K^+$ ) out of which 143 were  $Ca^{2+}$ -dependent. These included a number of signaling  
37 proteins such as catalytic and regulatory subunits of protein kinase A (PfPKAc and PfPKAr) and  
38 calcium-dependent protein kinase 1 (PfCDPK1). Proteins of the 14-3-3 family interact with  
39 phosphorylated target proteins to assemble signaling complexes. Here, using co-immunoprecipitation  
40 and gel filtration chromatography, we demonstrate that Pf14-3-3I binds phosphorylated PfPKAr and  
41 PfCDPK1 to mediate the assembly of a multi-protein complex in *P. falciparum* merozoites. A phospho-  
42 peptide, P1, based on the  $Ca^{2+}$  dependent phosphosites of PKAr, binds Pf14-3-3I and disrupts assembly  
43 of the Pf14-3-3I-mediated multi-protein complex. Disruption of the multi-protein complex with P1  
44 inhibits microneme secretion and RBC invasion. This study thus identifies a novel signaling complex  
45 that plays a key role in merozoite invasion of RBCs. Disruption of this signaling complex could serve  
46 as a novel approach to inhibit blood stage growth of malaria parasites.

47

48 **Importance**

49 Invasion of red blood cells (RBCs) by *Plasmodium falciparum* merozoites is a complex process that is  
50 regulated by intricate signaling pathways. Here, we have used phosphoproteomic profiling to identify  
51 the key proteins involved in signaling events during invasion. We found changes in the  
52 phosphorylation of various merozoite proteins including multiple kinases previously implicated in the  
53 process of invasion. We also found that a phosphorylation dependent multi-protein complex including  
54 signaling kinases assembles during the process of invasion. Disruption of this multi-protein complex  
55 impairs merozoite invasion of RBCs providing a novel approach for the development of inhibitors to  
56 block the growth of blood stage malaria parasites.

57

58

59

60

## 61 **Introduction**

62           The clinical symptoms of *Plasmodium falciparum* malaria are attributed to the blood stage of  
63 the parasite life cycle during which merozoites invade and multiply within host red blood cells (RBCs).  
64 Following the development of mature schizonts, newly formed merozoites egress and invade  
65 uninfected RBCs to initiate a new cycle of infection. The invasion of RBCs by *P. falciparum*  
66 merozoites is a complex multi-step process that is mediated by specific molecular interactions between  
67 red cell surface receptors and parasite protein ligands (1). These ligands are initially located in internal  
68 secretory organelles called micronemes and rhoptries and are released to the merozoite surface in  
69 tightly regulated steps (2).

70           Exposure of merozoites to a low potassium ( $K^+$ ) environment in blood plasma initiates a  
71 signaling cascade that involves second messengers like  $Ca^{2+}$  and cyclic nucleotides that activate  
72 effector molecules such as kinases and phosphatases (3-5). These effectors modulate phosphorylation  
73 of target proteins to activate merozoite motility, as well as secretion of invasion related proteins such as  
74 *P. falciparum* 175 kD erythrocyte binding antigen (PfEBA175) and apical merozoite antigen-1  
75 (PfAMA1) from the micronemes to the merozoite surface (2). The engagement of PfEBA175 with its  
76 receptor glycophorin A triggers another signaling cascade that leads to the release of rhoptry proteins  
77 such as PfrH2b (5). The secretion of microneme and rhoptry proteins seals the engagement of the  
78 merozoite with the RBC and enables completion of the invasion process.

79           The signaling mechanisms that regulate processes such as apical organelle secretion and  
80 merozoite motility during host cell invasion are not fully understood. Protein phosphorylation is known  
81 to be the primary regulator of biological signaling pathways and phosphoproteome analysis can provide  
82 information about the signaling pathways that are activated in a cell in response to different stimuli (6).  
83 Protein phosphorylation/dephosphorylation acts as a molecular switch that can lead to diverse  
84 outcomes including activation or deactivation of enzymes, preparation of proteins for degradation,  
85 translocation of proteins to various cellular compartments and establishment of protein-protein

86 interactions leading to the formation of multi-protein complexes that function in signaling pathways  
87 (7).

88         Phosphorylation-dependent formation of multi-protein signalling complexes plays a key role in  
89 the regulation of diverse cellular processes (8-10). For example, in human cells, phosphorylation of  
90 membrane-associated guanylate kinase-like domain-containing protein (CARMA) by protein kinase C  
91 (PKC) leads to the formation of CARMA1-Bcl10-MALT1 (CBM) complex, which activates the  
92 transcription factor NF- $\kappa$ B to regulate cell survival, activation and proliferation (8). A family of  
93 scaffold proteins, referred to as the 14-3-3 family, binds phosphorylated proteins to assemble signaling  
94 complexes in diverse systems (9-10). For example, in the brain, a 14-3-3 $\zeta$  dimer simultaneously binds  
95 and bridges the cytoskeletal protein tau and glycogen synthase kinase, GSK3 $\beta$ , to stimulate tau  
96 phosphorylation, which in turn regulates microtubule dynamics (9). In the case of *Arabidopsis thaliana*,  
97 calcium-dependent phosphorylation of a basic region/leucine-zipper (bZIP) transcription factor FD  
98 leads to the formation of a florigen complex with flowering locus T protein that is mediated by 14-3-3  
99 and regulates flowering (10). Phosphorylation analysis of *P. falciparum* schizont stages also reported  
100 the formation of a phosphorylation-dependent high-molecular-weight complex involving calcium-  
101 dependent protein kinase-1 (PfCDPK1) (11), although the precise composition of the complex was not  
102 defined.

103         In this study, we present a phospho-protein profile of *P. falciparum* merozoites and identify  
104 signal-dependent phosphorylation events that play important roles in the RBC invasion process.  
105 Importantly, we describe the formation of a phosphorylation-dependent, dynamic, high-molecular-  
106 weight complex involving PfCDPK1 and PfPKAr and explore the role of Pf14-3-3 in the assembly of  
107 this complex. Disruption of the Pf14-3-3-mediated protein complex with a peptide mimic inhibits RBC  
108 invasion by merozoites providing a novel strategy to block blood stage growth of malaria parasites.

109

## 110 **Results**

111 **Phosphoproteome analysis of *P. falciparum* merozoites.** Merozoites released from synchronized *P.*  
112 *falciparum* schizonts were purified (5) and processed for mass-spectrometric phosphoproteome  
113 analysis. The workflow used for phosphoproteomics and data analysis are outlined in Figure S1.  
114 Dataset S1 provides the list of phosphorylated proteins and phosphosites identified in *P. falciparum*  
115 merozoites. Comparison with the published *P. falciparum* merozoite phosphoproteome (12) identified  
116 2786 phosphosites and 666 merozoite phosphoproteins that are unique to our study (Fig. 1a). Potential  
117 protein-protein interactions in the merozoite phosphoproteome are illustrated as MCODE clusters (Fig.  
118 S2 and Dataset S2). Enriched in MCODE cluster 1 are 132 proteins relevant to host cell invasion (Fig.  
119 1b). The phosphorylated proteins in MCODE cluster 1 include signaling related proteins such as  
120 Protein Kinase G (PfPKG; PF3D7\_1436600), Guanylate Cyclase (PfGC; PF3D7\_1138400), Protein  
121 Kinase A regulatory subunit (PfPKAr; PF3D7\_1223100), Protein Kinase A catalytic subunit (PfPKAc;  
122 PF3D7\_0934800), Calcium Dependent Protein Kinase 1 (PfCDPK1; PF3D7\_0217500) and Calcium-  
123 Dependent Protein Phosphatase Calcineurin (PfCNA; PF3D7\_0802800) as well as invasion related  
124 parasite proteins such as merozoite surface protein-1 (MSP1), erythrocyte binding antigens (EBA181,  
125 EBA140) rhoptry neck proteins (RON2, RON3, RON4) and parasite proteins responsible for motility  
126 such as GAP45, GAP40, MyoA, MyoB and MTIP (Fig. 1b). The presence of both calcium and cyclic  
127 nucleotide responsive effectors in MCODE cluster 1 (Fig. 1b) indicates significant crosstalk between  
128 these second messengers at the time of invasion.

129

130 **Exposure of *P. falciparum* merozoites to an ionic environment mimicking blood plasma induces**  
131 **changes in protein phosphorylation.** We have shown previously that merozoites respond to changes  
132 in their ionic environment, especially changes in potassium ion ( $K^+$ ) concentration (5). Exposure of  
133 merozoites to a low  $K^+$  environment, which is characteristic of extracellular ionic conditions in blood

134 plasma, serves as a signal to trigger a rise in  $\text{Ca}^{2+}$  and cAMP, which activates signaling cascades (4, 5).  
135 We performed quantitative phosphoproteomics on merozoites resuspended in buffers mimicking  
136 intracellular and extracellular ionic conditions (IC buffer and EC buffer) to identify differences in  
137 protein phosphorylation. This resulted in the identification of 1499 unique phosphosites corresponding  
138 to 587 *P. falciparum* proteins (Dataset S3).  $\text{Ca}^{2+}$ -dependent changes in phosphorylation were identified  
139 by studying differences in phosphorylation of merozoite proteins in IC buffer compared to either EC  
140 buffer or EC buffer + BAPTA-AM (EC-BA) (Dataset S3).

141 Proteins exhibiting statistically significant fold changes in phosphorylation at specific amino  
142 acid residues in merozoites in EC buffer compared to IC buffer and in EC-BA buffer compared to IC  
143 buffer were identified. Peptides from the same proteins without any phosphorylation were quantified  
144 and used to normalize for differences in concentration of proteins in merozoite samples under different  
145 conditions. Based on results of two independent biological replicates with each replicate analyzed two  
146 times by mass spectrometry, we identified 394 phosphoresidues as significantly altered when  
147 merozoites are exposed to EC buffer compared to IC buffer. Of these, phosphorylation at 143 sites is  
148 blocked by  $\text{Ca}^{2+}$  chelator, BAPTA-AM (Datasets S3 and S4). Changes in phosphorylation of some key  
149 signaling related proteins such as PfPKA-R, PfCDPK1 and Pf14-3-3I were observed (Figs. 2a, 2b).  
150 Phosphorylation of PfCDPK1 on Ser 28/34, and Ser 64 was significantly upregulated in merozoites  
151 exposed to EC buffer as compared to IC buffer (Fig. 2a, 2c). Chelation of  $\text{Ca}^{2+}$  with BAPTA-AM had  
152 no effect on these phosphorylation events (Fig. 2b, 2c). Phosphorylation on Ser 17 and Ser 217 of  
153 PfCDPK1 was found to be higher in merozoites in EC-BA buffer compared to IC buffer. However,  
154 there was no increase in phosphorylation of Ser 17 and Ser 217 in EC buffer compared with IC buffer  
155 (Fig. 2c). In contrast, phosphorylation of PfPKAr in EC buffer at Ser 113/Ser 114 was dependent on the  
156 presence of  $\text{Ca}^{2+}$  (Fig. 2d). Corresponding spectra and quantification profile for phosphorylation of  
157 PfCDPK1 on Ser 28/34 and of PfPKAr on Ser 113/Ser 114 are represented in Fig. S3. PfCDPK1 and

158 PfkAr are known to be involved in RBC invasion by merozoites (4,13). We, therefore, investigated  
159 further the relevance of changes in their phosphorylation status to the process of invasion.

160 The changes in phosphorylation of key signaling proteins, PfCDPK1, PfkAr and Pf14-3-3I, in  
161 EC buffer compared to IC buffer were also confirmed using anti-phosphoserine antibodies. Lysates of  
162 *P. falciparum* merozoites in IC and EC buffers were used for IP with anti-PfCDPK1 and anti-PfkAr  
163 sera. The IPs were separated by SDS-PAGE and PfCDPK1 and PfkAr were detected by western  
164 blotting. The blots were also probed with anti-phosphoserine antibodies to determine levels of serine  
165 phosphorylation in these proteins (Fig. S4a). Western blotting with anti-phosphoserine antibodies  
166 confirmed that the levels of phosphorylated serines in PfCDPK1 and PfkAr were higher in EC buffer  
167 compared to IC buffer (Fig. S4a). Moreover, each IP sample showed multiple proteins with increased  
168 serine phosphorylation suggesting that these phosphorylated proteins may interact with each other to  
169 form a multi-protein complex.

170

171 **Formation of a multi-protein complex involving PfkAr, PfCDPK1 and Pf14-3-3I in *P. falciparum***  
172 **merozoites.** To investigate the interactions of signaling proteins, PfkAr and PfCDPK1, in merozoites,  
173 we immunoprecipitated PfkAr and PfCDPK1 from merozoite lysates using specific polyclonal sera  
174 and identified interacting proteins in the IPs by mass spectrometry. The presence of PfkAr in IPs with  
175 anti-PfCDPK1 sera was confirmed by detection of multiple PfkAr peptides with greater than 50%  
176 sequence coverage (Table 1). Similarly, presence of PfCDPK1 is confirmed in IPs performed with anti-  
177 PfkAr sera. Multiple PfCDPK1 peptides, with greater than 50% sequence coverage, are detected in IPs  
178 performed with anti-PfkAr sera (Table 1). In addition, the scaffold protein, Pf14-3-3I, is also detected  
179 in IPs performed with both anti-PfCDPK1 and anti-PfkAr sera with multiple Pf14-3-3I peptides  
180 detected that provide greater than 50% sequence coverage. The presence of Pf14-3-3I in the complex is  
181 further confirmed by detection of PfCDPK1 and PfkAr peptides with greater than 50% sequence



182 coverage in IPs performed with anti-Pf14-3-3I sera (Table 1). These studies suggest that Pf14-3-3I,  
183 PfCDPK1 and PfPKAr interact to form a multi-protein complex in *P. falciparum* merozoites (Table 1).  
184 In addition to PfPKAr, PfCDPK1 and Pf14-3-3I, four other proteins (elongation factor 1-alpha,  
185 glyceraldehyde-3-phosphate dehydrogenase (GAPDH), phosphoethanolamine N-methyltransferase  
186 (PMT), actin-depolymerizing factor 1 (ADF1)) were detected at similar stringency levels in IPs with all  
187 three sera, (anti-PfPKAr, anti-PfCDPK1 and anti-Pf14-3-3I sera) (Dataset S5). A number of other  
188 proteins are detected at lower stringency in the IPs by mass spectrometry (Dataset S5). As a negative  
189 control for specificity, we used specific antisera to *P. falciparum* protein kinase G (PfPKG) to detect its  
190 presence in IPs with anti-PfCDPK1, anti-PfPKAr and anti-14-3-3I sera. PfPKG was not detected in IP  
191 pellets with anti-PfPKAr, anti-PfCDPK1 and anti-Pf14-3-3I sera (Fig. S4b). PfPKG was also not  
192 detected in IPs with anti-PfPKAr, anti-PfCDPK1 and anti-Pf14-3-3I sera by mass spectrometry.

193 The IPs described above were carried out with lysates made from merozoites resuspended in  
194 RPMI 1640, which has low  $K^+$  levels. Next, we investigated if the interactions of Pf14-3-3I, PfPKAr  
195 and PfCDPK1 are dependent on the external ionic environment and if intracellular  $Ca^{2+}$  plays a role in  
196 these interactions. Lysates of merozoites resuspended in IC, EC and EC-BA buffers were used for IP  
197 with specific sera against PfCDPK1, PfPKAr and Pf14-3-3I. The IP elutes were probed for the presence  
198 of interacting partners. PfCDPK1 and Pf14-3-3I were detected in IPs generated with specific anti-  
199 PfPKAr sera with lysates prepared from merozoites in EC buffer (Fig. 3a). In contrast, the amounts of  
200 PfCDPK1 and Pf14-3-3I in IP elutes with anti-PfPKAr sera were significantly lower in lysates prepared  
201 from merozoites in IC and EC-BA buffers. The interactions of PfPKAr with PfCDPK1 and Pf14-3-3I  
202 are thus favored when merozoites are exposed to a low  $K^+$  environment (Fig. 3a). Moreover, the  
203 reduced signal in IPs in case of merozoites in EC-BA buffer indicates that this interaction requires  $Ca^{2+}$ .  
204 However, the interaction between Pf14-3-3I and PfCDPK1 is not dependent on presence of  $Ca^{2+}$  (Fig.  
205 3b and 3c). Collectively, these observations suggest that PfPKAr, PfCDPK1, and Pf14-3-3I form a  
206 multi-protein complex when merozoites are exposed to a low  $K^+$  environment typical of blood plasma.

207 The interaction of PfPKAr with the multi-protein complex is dependent on the presence of intracellular  
208  $\text{Ca}^{2+}$ , whereas the interaction of PfCDPK1 is independent of  $\text{Ca}^{2+}$ .

209 Size exclusion chromatography was also used to detect the presence of the multi-protein  
210 complex including PfPKAr, PfCDPK1 and Pf14-3-3I in merozoite lysates. When lysates were  
211 prepared from merozoites treated with IC buffer, PfPKAr, PfCDPK1 and Pf14-3-3I primarily migrated  
212 at positions reflecting their monomeric or dimeric sizes (Fig. 4). Some Pf14-3-3 and PfPKAr proteins  
213 were found in the higher molecular weight fractions in IC buffer, as 14-3-3 can exist in the form of  
214 homodimer (14) and PfPKAr interacts with PfPKAc (3). In contrast, when lysates were prepared from  
215 merozoites in EC buffer, PfPKAr, PfCDPK1 and Pf14-3-3I were primarily present in a high-molecular-  
216 weight complex migrating between 150 to 250 kDa (Fig. 4). Assembly of the PfPKAr, PfCDPK1, and  
217 Pf14-3-3I complex in merozoites is thus dynamic in nature and assembles in merozoites exposed to a  
218 low  $\text{K}^+$  ionic environment (Fig. 4).

219

220 **Recombinant Pf14-3-3I binds specifically to a phosphopeptide based on PfPKAr.** Phosphorylation  
221 of PfPKAr at Ser 113 and Ser 114 following exposure of merozoites to EC buffer is dynamic and  
222 depends on intracellular  $\text{Ca}^{2+}$  levels (Fig. 2). The phosphorylation of PfPKAr and the interaction  
223 between PfPKAr and Pf14-3-3I are both dependent on the presence of  $\text{Ca}^{2+}$  (Figs. 2 and 3). As 14-3-3  
224 family proteins are phospho-recognition scaffold proteins that participate in the formation of multi-  
225 protein complexes (9, 14), we hypothesized that interaction between Pf14-3-3I and PfPKAr requires  
226  $\text{Ca}^{2+}$ -dependent phosphorylation of PfPKAr at Ser 113 and Ser 114. To test this hypothesis, we  
227 synthesized three peptides including phosphopeptide P1 spanning the sequence of phosphorylated Ser  
228 113 and Ser 114 (NDDG**pSp**SDG; P1), a non-phosphorylated peptide (NDDGSSDG; P2) and a  
229 scrambled phosphorylated P1 peptide with a random distribution of the phospho-Ser residues  
230 (pSDNGpSGDD; P3). These peptides were immobilized on agarose beads and incubated with  
231 recombinant GST-tagged Pf14-3-3I protein. There was significant binding of Pf14-3-3I-GST to beads

232 coated with synthetic peptide P1, but none or only marginal binding to beads coated with synthetic  
233 peptides P2 and P3 (Fig. 5a). Known 14-3-3 binding peptides AA (ARSHpSYPA) and RA  
234 (RLYHpSLPA) based on canonical 14-3-3 binding motifs (15) also showed binding to Pf14-3-3I-GST  
235 similar to peptide P1 in control experiments (Fig. 5a).

236

237 **Phosphopeptide from PfPKAr specifically inhibits interaction between Pf14-3-3I and PfPKAr in**  
238 **merozoites.** Given that phosphopeptide P1 can bind to Pf14-3-3I *in vitro*, we next tested if P1 can  
239 inhibit binding of Pf14-3-3I to PfPKAr to inhibit multi-protein complex formation in merozoites. We  
240 first confirmed that peptide P1 can enter *P. falciparum* merozoites. Peptide P1 tagged with fluorophore  
241 fluorescein isothiocyanate (FITC) was incubated with merozoites and tested for uptake by detecting the  
242 internalized peptide by fluorimetry (Fig. S5). Uptake of P1-FITC was observed at concentrations above  
243 25  $\mu$ M (Fig. S5). Merozoites were incubated with peptides P1, P2 and P3 at 100  $\mu$ M. Subsequently,  
244 merozoite lysates were used for IP with anti-Pf14-3-3I antisera. PfPKAr and PfCDPK1 were detected  
245 in the IPs by western blotting. Phosphorylated peptide P1 inhibited the interaction between Pf14-3-3I  
246 and PfPKAr, while peptides P2 and P3 had no effect (Fig 5b). Interestingly, none of the peptides (P1,  
247 P2, and P3) had any effect on the interaction between Pf14-3-3I and PfCDPK1. The small-molecule  
248 inhibitor BV02 that blocks binding of mammalian 14-3-3 to its phosphorylated target proteins (15,16),  
249 inhibited binding of both PfPKAr and PfCDPK1 with Pf14-3-3I (Fig. 5c).

250

251 **Blocking Pf14-3-3I interactions inhibits merozoite invasion of RBCs and microneme secretion.**  
252 We observed above that a low  $K^+$  environment triggered Pf14-3-3I mediated formation of a high-  
253 molecular-weight multi-protein complex composed of PfCDPK1, PfPKAr, and PKAc, all of which are  
254 involved in RBC invasion (4, 5, 17). Next, we investigated if disruption of Pf14-3-3I-mediated binding

255 of PfPKAr and PfCDPK1 can inhibit RBC invasion. *P. falciparum* merozoites isolated in low K<sup>+</sup> buffer  
256 were treated with increasing concentrations of peptides P1, P2 and P3 (10 μM, 50 μM or 100 μM) and  
257 BV02 (0.5 μM, 1 μM, 1.5 μM or 2 μM). Treated merozoites were then incubated with RBCs in  
258 complete RPMI medium to allow invasion. Newly invaded ring-stage parasites were scored by flow  
259 cytometry. Treatment of merozoites with peptide P1 and BV02 reduced the efficiency of erythrocyte  
260 invasion in a dose-dependent manner (Fig. 6a). Control peptides, P2 (without phosphorylation) and P3  
261 (scrambled phosphopeptide) had no inhibitory effect on invasion.

262         The secretion of parasite invasion ligands from micronemes is a critical step in the invasion  
263 process (2). Given that PfCDPK1 and PfPKAr have both been implicated in microneme secretion (4,  
264 5), we examined if disruption of the high-molecular-weight multi-protein complex composed of  
265 PfCDPK1, PfPKAr, and PKAc, can disrupt microneme secretion. Treatment of merozoites with peptide  
266 P1 inhibited secretion of microneme protein PfAMA1, whereas control peptides P2 and P3 had no  
267 effect (Fig. 6b). BV02 and peptides AA and RA also inhibit PfAMA1 discharge (Fig. 6b). Formation of  
268 the Pf14-3-3I-mediated multi-protein complex, which includes PfCDPK1 and PfPKAr, thus appears to  
269 be important for regulation of microneme secretion, a key step in the invasion process.

## 270 Discussion

271           Though there are many studies describing the intraerythrocytic phosphoproteomic profiles of *P.*  
272 *falciparum* blood stages, only one previous study described the phosphoproteome of free merozoites  
273 (12). However, it did not address dynamic changes in the merozoite phosphoproteome during the key  
274 process of RBC invasion. Here, we have investigated changes in the phosphoproteome of free  
275 merozoites following exposure to the environmental signal of low  $K^+$  as found in blood plasma during  
276 the process of invasion following egress from schizonts.

277           The study identified signal-dependent changes in phosphorylation of merozoite proteins  
278 shedding light on molecular events that govern RBC invasion. Gene Ontology and protein-protein  
279 interaction analyses predicted that a significant number of the phosphorylated proteins identified  
280 in merozoites have potential roles in signaling and invasion related processes. Analysis of protein  
281 interaction data indicated that various proteins from these categories cluster together (Fig. 1b). Of  
282 these, the most notable invasion related proteins are inner membrane complex (IMC) proteins like  
283 PfIMC1c and PfIMC1g that are associated with merozoite motility (1). These proteins connect to  
284 myosin filaments that form the conserved molecular machinery for merozoite motility that is necessary  
285 for invasion. Various myosin molecules, PfMyoA, PfMyoB and PfMyoE, as well as glideosome-  
286 associated proteins, PfGAP40 and PfGAP45, were phosphorylated. It has been proposed recently that  
287 regulated phosphorylation of S19 in PfMyoA may enhance force generation during parasite invasion  
288 (18).

289           At the time of merozoite egress and re-invasion, signaling cascades are initiated through the  
290 generation of second messengers including  $Ca^{2+}$ , cAMP, and cGMP (2, 3). We found that various  
291 kinases and phosphatases in MCODE cluster 1, which are regulated by these secondary messengers and  
292 are associated with the process of secretion and invasion, are phosphorylated (Fig 1b). For example,  
293 calcium-dependent protein kinase PfCDPK1, PfPKAc, PfPKAr, PfPKG and the calcium dependent  
294 phosphatase, PfcNA (3,11,12,17,19,20), were phosphorylated. Our previous studies have demonstrated

295 that exposure of merozoites to a low  $K^+$  environment in blood plasma following egress results in a rise  
296 in cytosolic  $Ca^{2+}$ , which initiates the release of invasion-related microneme proteins (5). We  
297 investigated changes in protein phosphorylation following the transfer of free merozoites from a buffer  
298 with high  $K^+$  (IC buffer) to one with low  $K^+$  (EC buffer). The role of intracellular  $Ca^{2+}$  in  
299 phosphorylation was also investigated by transferring merozoites to EC buffer with the intracellular  
300  $Ca^{2+}$  chelator, BAPTA-AM (EC-BA). Phosphorylation changes occurred at 394 sites located on 314  
301 peptides, with 76 peptides having dual phosphorylations when merozoites were transferred from IC to  
302 EC buffer. Out of these 143 phosphorylation events were found to be  $Ca^{2+}$ -dependent and were located  
303 on 119 peptides, 24 of which displayed dual phosphorylations. The employment of IMAC-based  
304 enrichment identified many dual phosphorylation events, which were not previously reported. Such  
305 dual phosphorylations can influence the activity of kinases. For example, dual phosphorylation of  
306 extracellular signal-regulated kinase 2 (ERK2) increases its activity by 10- to 100-fold (21). We  
307 observed many calcium-dependent dual phosphorylations on proteins with diverse functions in the life  
308 cycle of the parasite. These included proteins known to be involved in organelle secretion and invasion-  
309 related processes. For example, dual phosphorylation of inner membrane complex (IMC) protein,  
310 PfIMC1g, at Thr189/Ser191 and Tyr272/Ser274, and the glideosome-associated protein 45 (PfGAP45)  
311 at Ser156/Thr158 was observed. Both these proteins are known to be phosphorylated by a calcium-  
312 dependent kinase, PfCDPK1 (17). We also observed  $Ca^{2+}$ -dependent dual phosphorylation of PfPKAr  
313 at Ser113/Ser114, but by contrast dual phosphorylation at Ser28/Ser34 of PfCDPK1 was not  $Ca^{2+}$ -  
314 dependent.

315 Interactions between PfPKAr and PfCDPK1 and between PfPKAr and Pf14-3-3I have been  
316 observed previously (17,22). Here, we demonstrated that these interactions are phosphorylation-  
317 dependent and dynamic (Fig. 3). Moreover, they lead to the formation of a high-molecular-weight  
318 (150-250 kDa) multi-protein signaling complex that assembles in response to a change in the  
319 environmental ionic composition to which egressed merozoites are exposed (Fig 4d). PfCDPK1 was

320 previously shown to be present in merozoites in a high-molecular-weight complex, but the composition  
321 and dynamic nature of the complex was not described (11). A related study has shown by  
322 immunofluorescence microscopy that Pf14-3-3I colocalizes with PfCDPK1 at the periphery of  
323 merozoites (23). Our mass spectrometric analyses demonstrated that the complex contains PfCDPK1,  
324 Pf14-3-3I, PfPKAr, and PfPKAc, but interestingly, it failed to detect PfPKG that has also been  
325 implicated in apical organelle secretion at the time of merozoite invasion (24). A previous study on  
326 protein signaling complexes also did not detect PfPKG in the high-molecular-weight complex with  
327 PfCDPK1 (11).

328         Members of the 14-3-3 family of scaffold proteins bind target proteins in a phosphorylation-  
329 dependent manner through recognition of optimal consensus sequence motifs corresponding to mode-I  
330 (RXXpS/pT), mode-II (RXXXpS/pT) or mode-III (RXXpS/pTX1-2 C'), thus regulating a wide variety  
331 of cellular processes (25-28). Disruption of the interactions mediated by 14-3-3 proteins results in  
332 ablation of key cellular processes (17). Here, we show that peptides based on the dual phosphorylation  
333 of PfPKAr at Ser 113 and Ser 114 (peptide P1), as well as inhibitory peptides, AA and RA, that are  
334 based on consensus sequences in 14-3-3 binding proteins from mammalian cells, and 14-3-3 based  
335 inhibitory small molecule, BV02, all inhibited the formation of the multi-protein complex (Fig. 5b, c).  
336 The inhibitory peptides and BV02 also blocked secretion of microneme protein PfAMA1 and RBC  
337 invasion, demonstrating that assembly of this signaling complex plays a critical role in these processes  
338 (Fig. 6). A related study has confirmed the phosphorylation dependent interaction of recombinant Pf14-  
339 3-3I and PfCDPK1 using ELISA plate based binding assays as well as surface plasmon resonance  
340 (SPR) and isothermal calorimetry (ITC) (23). Moreover, the study shows that peptides AA and RA  
341 inhibit PfCDPK1 binding with Pf14-3-3I and block blood stage parasite growth (23). Here, we  
342 demonstrate that phosphopeptides, P1 and P2, that are based on PfPKAr sequences that interact with  
343 Pf14-3-3I, inhibit interaction of PfPKAr with Pf14-3-3I and block microneme secretion and RBC  
344 invasion by *P. falciparum* merozoites.

345 14-3-3 homologs in mammalian cells are known to serve as the central hub for signaling  
346 networks that regulate cell proliferation, adhesion, survival, and apoptosis (15). Given its central role in  
347 cell growth, 14-3-3 is also implicated in the development of cancer, and small molecule inhibitors that  
348 target its scaffold function are being developed for cancer therapy (29). In this study, we have shown  
349 that targeting the assembly of the multi-protein complex in merozoites mediated by Pf14-3-3I provides  
350 a novel strategy to inhibit the blood-stage growth of malaria parasites.

351

## 352 **Materials and Methods**

353 ***P. falciparum* merozoite isolation.** *P. falciparum* 3D7 blood stages were cultured *in vitro* and  
354 merozoites were isolated as previously described (5,30). Mature synchronized schizonts were  
355 transferred to IC buffer (142 mM KCl, 5 mM NaCl, 2 mM EGTA, 1 mM MgCl<sub>2</sub>, 5.6 mM glucose, 25  
356 mM Hepes, pH 7.2). Released merozoites were collected by centrifugation as described previously (5)  
357 and resuspended in IC buffer, EC buffer (5mM KCl, 142 mM NaCl, 1 mM CaCl<sub>2</sub>, 1 mM MgCl<sub>2</sub>, 5.6  
358 mM glucose and 25 mM Hepes, pH 7.2) or EC-BA buffer (EC buffer supplemented with 50 mM  
359 BAPTA-AM (Calbiochem)) at 37<sup>0</sup>C for 15 mins with or without inhibitors as required. Merozoites  
360 pellets were prepared by centrifugation at 3300g for 5 min and stored at -80°C for further analysis.

361

362 **Protein isolation, desalting, and digestion.** Isolated merozoites were lysed by incubation with urea  
363 lysis buffer on ice for 15 min followed by sonication for 3 x 30 seconds on ice. Protein concentration  
364 was quantified by Pierce™ BCA Protein Assay Kit as per the supplier's protocol. 6-7 mg of total  
365 protein was used for each biological replicate for the label-free phosphoproteomics experiment. For the  
366 quantitative experiment, 100 µg of total protein isolated from IC, EC, and EC-BA treated merozoites  
367 was used for labeling as described below. The isolated proteins were reduced, alkylated and digested  
368 with trypsin gold (Promega) with 1:200 enzyme to substrate ratio, at 37°C overnight. Tryptic digested



369 peptides from the label-free experiment were desalted with reverse-phase tC18 SepPak solid-phase  
370 extraction cartridge 500mg (Waters) as described previously (31).

371

372 **Ion-exchange fractionation of *P. falciparum* merozoite lysates.** Fractionation of desalted peptides  
373 was carried out with strong cation exchange (SCX) chromatography on a polySULFOETHYL-A  
374 column as described before (31). 12-15 fractions of 4ml were collected, lyophilized till the volume was  
375 reduced to 30% and desalted as described above.

376

377 **Tandem Mass Tag (TMT) labeling and fractionation using hydrophilic interaction liquid**  
378 **chromatography (HILIC).** Proteins isolated from merozoites in IC, EC, and EC-BA buffers were  
379 digested with trypsin and peptides were labeled separately with TMT tags with mass 128, 129 and 130  
380 respectively as per the manufacturer's instructions. Labeled peptide samples were combined and  
381 fractionated by HILIC using method described previously (32). 12-15 fractions (0.5 ml) were collected  
382 and lyophilized for further use.

383

384 **Immobilized metal affinity chromatography (IMAC) and TiO<sub>2</sub>/ZrO<sub>2</sub> phosphopeptide enrichment**  
385 **and desalting.** Combined IMAC based phosphoproteomic enrichment and desalting was carried out as  
386 described previously (31). Peptide fractions were incubated on a rotating platform with IMAC beads  
387 (PHOS-Select iron affinity gel (Sigma)) for 1hr at RT. During this time StageTips (33) were prepared  
388 using Empore 3M C18 material (Fisher Scientific). After incubation, IMAC beads were added on top  
389 of the StageTips and the flow-through was collected and concentrated on a speedvac. Phosphopeptides  
390 were eluted from IMAC resin onto C18 loaded tips and desalted. Phosphopeptides were eluted from  
391 C18 StageTips, lyophilized and stored at -80°C. Flow through from IMAC was used further for

392 phosphopeptide enrichment using TiO<sub>2</sub>/ZrO<sub>2</sub> NuTip (Glygen) as per manufacturer's protocol.  
393 Phosphopeptides were eluted, concentrated by speedvac centrifugation and stored at -20°C till further  
394 analysis.

395

396 **Liquid chromatography-tandem mass spectrometry.** LC-MS/MS was carried out using a Nano LC-  
397 1000 HPLC nanoflow system (ThermoFisher Scientific) and hybrid Orbitrap Velos Pro mass  
398 spectrometer (ThermoFisher Scientific). Peptides were separated by a 120 min gradient using  
399 Acclaim® PepMap100 C18 column and eluted onto the mass spectrometer. Data acquisition was  
400 performed in a data-dependent mode to automatically switch between MS, MS<sub>2</sub>. Full-scan MS spectra  
401 of intact peptides (m/z 350–1000) were acquired in the Orbitrap with a resolution of 60,000. Top 20  
402 precursors were sequentially isolated and fragmented in the high-energy collisional dissociation (HCD)  
403 cell. Dynamic exclusion was 50 s and a minimum 500 counts for Mz and 200 counts for TMT sets were  
404 required for MS<sub>2</sub> selection.

405

406 **Data analysis for TMT and label free phosphoproteomic data.** All raw files were searched against a  
407 *P. falciparum* database using an OpenMS pipeline (34) containing the two search engines Mascot and  
408 MSGF+, followed by Percolator post-processing and phosphorylation analysis using PhosphoScoring,  
409 an implementation of the Ascore algorithm (35). Search parameters were: carbamidomethylation of  
410 cysteines was set as a fixed modification, oxidation of methionine, protein N-terminal acetylation, and  
411 STY phosphorylation were set as variable modifications. The mass tolerances in MS and MS/MS were  
412 set to 20 ppm and 0.5 Da respectively. A false discovery rate of 1% was set up for both protein and  
413 peptide levels. TMT experiment, TMT-6plex labeling on lysine and N-termini was searched for protein  
414 quantitation. Phosphoscore more than 11 was considered as a significant localization score.

415 Data was also searched using MaxQuant (version 1.5.3.8) (with the Andromeda search engine)  
416 against a *P. falciparum* database. The following search parameters were applied: carbamidomethylation  
417 of cysteines was set as a fixed modification, oxidation of methionine, protein N-terminal acetylation,  
418 and STY phosphorylation was set as variable modifications. The mass tolerances in MS and MS/MS  
419 were set to 5 ppm and 0.5 Da respectively. A false discovery rate of 1% was set up for both protein and  
420 peptide levels. TMT-6plex labeling on Lysine and N-termini was searched for protein quantitation.  
421 Phospho-localization probability of more than 75% was considered as significant localization.  
422 Quantification from MaxQuant analysis was used for quantification of changes in the phosphorylation.  
423 All phospho-spectra of interest were manually validated.

424 To determine whether the variation of the quantification of a phosphopeptide is due to a  
425 variation in the abundance of the protein itself, or due to a variation in the abundance of its  
426 modification, a statistical test was performed to compare the variation in abundance of each  
427 phosphopeptide to the abundance of the corresponding protein. To do this for a specific  
428 phosphopeptide, we first estimated the average  $m$  and standard deviation  $s$  of the  $\log_2$  fold change  
429 ( $\log_2\text{FC}$ ) of the non-modified peptides of the protein (where FC is equal to either  $\overline{EC}/\overline{IC}$  or  $\overline{EC} - \overline{BA}/$   
430  $\overline{IC}$ ,  $\bar{x}$  being the average intensity observed for a peptide in the condition  $x$ ). Assuming that the  $\log_2\text{FC}$   
431 of the non-modified peptides follows a Normal distribution centered on  $m$  and having a standard  
432 deviation of  $s$ , we deduce a p-value related to the test that the measured  $\log_2\text{FC}$  for the phosphopeptide  
433 is equal to  $m$  by  $2 \times P_{N(m,s)}(\log_2(\text{FC}))$  if  $\log_2(\text{FC}) < m$  and  $2 \times (1 - P_{N(m,s)}(\log_2(\text{FC})))$  if  
434  $\log_2(\text{FC}) \geq m$ , where  $P_{N(m,s)}$  is the cumulative distribution function of  $N(m, s)$ . Note that this p-value  
435 is computed only when we have at least 3 non-modified peptides with intensity values for a protein.

436

437 **Phosphorylated protein interaction network analysis.** The merozoite phosphoproteome interaction  
438 network was constructed using STRING database and visualized in Cytoscape version 3.7.1 (36). The  
439 merozoite phospho-interactome was analyzed for highly connected nodes with the molecular complex  
440 detection clustering algorithm MCODE (37).

441

442 **Gene ontology and motif analysis.** All *P. falciparum* gene ontology analyses were performed with the  
443 inbuilt result analysis tool for gene ontology on PlasmoDB database. Phosphopeptides with a width of  
444 15 amino acids were subjected to motif analysis using MotifX (38,39). A background of *P.*  
445 *falciparum* protein database was used for the analysis and occurrences threshold was set to default  
446 P-value threshold of  $\leq 1e^{-6}$  was used to identify enriched motifs.

447

448 **Immunoprecipitation (IP), LC-MS/MS and data analysis.** IP of proteins from merozoites isolated in  
449 cRPMI or resuspended in IC, EC, and EC-BA buffers or treated with specific inhibitors or peptides  
450 were performed with Pierce Co-Immunoprecipitation (Co-IP) Kit (Pierce) as per the manufacturer's  
451 protocol. Identity of proteins from the respective elute of IP experiments was investigated using an  
452 Orbitrap Q Exactive Plus mass spectrometer (ThermoFisher Scientific) or by western blotting. Data  
453 were searched using MaxQuant as described above.

454

455 **Gel-filtration on Superdex 200.** *P. falciparum* merozoites treated with IC or EC buffer were lysed and  
456 cleared by centrifugation. Proteins were fractionated with Superdex 200 column (GE Healthcare,  
457 10×300 mm). Fractions of 1 ml were collected and analyzed by western blotting for the presence of  
458 PfPKAr, Pf14-3-3I, and PfCDPK1 in respective fractions.

459

460 **Binding of recombinant Pf14-3-3I to synthetic peptide-coated beads.** Peptides (AA, RA, P1, P2,  
461 and P3) were coupled to agarose beads using Co-IP kit (Pierce) as per manufacturer's instruction.  
462 Respective peptide coated beads were incubated with GST tagged Pf14-3-3I protein, non-coated beads  
463 were used as a control. Recombinant protein bound to the beads were eluted and elutes were tested by  
464 western blotting using anti-Pf14-3-3I mouse sera.

465

466 **Invasion assay with *P. falciparum* merozoites and flow cytometry.** Merozoites isolated as described  
467 above were treated with inhibitors (BV02 at 0.5 $\mu$ M, 1 $\mu$ M, 1.5 $\mu$ M, 2 $\mu$ M) and peptides (P1, P2, P3 at  
468 10 $\mu$ M, 50 $\mu$ M, 100 $\mu$ M) for 15 min at 37°C followed by incubation with RBC in presence of the  
469 inhibitor or peptide to allow invasion and growth for 24 h under standard culturing conditions. Solvents  
470 used to dissolve the inhibitors were used as control. The parasitemia was determined by flow cytometry  
471 after staining with SYBR-GreenI (Sigma) as described (40). Data were analyzed with FlowJo (Tree  
472 Star) and percent inhibition of invasion was calculated using the formula:  $(1 - T/C) \times 100$ ; where T and  
473 C denote parasitemia in treatment and control samples respectively.

474

475 **Microneme secretion assay.** *P. falciparum* merozoites isolated in cRPMI were incubated for 15 min at  
476 37°C with BV02 (2 $\mu$ M) or AA (100 $\mu$ M) or RA (100 $\mu$ M) or DMSO (solvent) and with Peptides P1, P2,  
477 P3 (100 $\mu$ M each) or RPMI (solvent). Following incubation, merozoites and supernatants were  
478 separated by centrifugation and the presence of PfAMA1 (microneme protein), and PfNapL (cytosolic  
479 protein used as lysis control) in the supernatant, and PfNapL in the pellet (cytosolic protein used as a  
480 loading control) were detected by western blotting as described above.

481

482 **Densitometry and statistical analysis.** Image J (NIH) software was used to perform densitometry of  
483 western blots. The band intensity of the loading control was used for normalization. Statistical analysis  
484 for all the plots was performed using GraphPad Prism 8.1.2 software. All experiments were analyzed  
485 using multiple *t*-test (assuming equal standard error (SE)) and  $P \leq 0.05$  was considered significant, \*=  
486  $P < 0.05$ ; \*\*=  $P < 0.005$ ; and \*\*\*=  $P < 0.0005$ . The graphs were plotted with a mean  $\pm$  SEM of the  
487 population.

488

489 **Data availability.** The mass spectrometry-based proteomics data have been deposited to the  
490 ProteomeXchange Consortium (<http://proteomecentral.proteomexchange.org>) via the PRIDE (41)  
491 partner repository with the data set identifier PXD015093.

492 Reviewer account details: Username: reviewer83422@ebi.ac.uk; Password: MNKnPy0v

493 All other relevant data are available from the authors upon request.

494 **Acknowledgments**

495 This work was supported by MolSigMal grant (ANR-17-CE15-0010) from Agence Nationale de la  
496 Recherche (ANR) to CEC and internal funds from the Institut Pasteur. GL acknowledges support from  
497 the Labex ParaFrap (ANR-11-LABX-0024). KRM received a Short Term Fellowship from European  
498 Molecular Biology Organization (EMBO).

499

500 **Author Contributions**

501 KRM designed and performed all experiments, analyzed data and wrote the first draft of the  
502 manuscript; IK performed MS/MS experiments and preliminary analysis; QGG and BI performed bio-  
503 informatic and statistical analysis of phosphoproteomics data; TC performed MS/MS analysis of  
504 immunoprecipitation experiments; RJ produced reagents (antibodies to Pf14-3-3 and plasmid construct  
505 for expression of recombinant Pf14-3-3I); CH produced recombinant Pf14-3-3 for use in binding  
506 experiments and performed GPC to detect multi-protein complexes in parasite lysates; MM supervised  
507 MS/MS experiments and data analysis; HW and PG helped with analysis of phosphoproteomics data;  
508 JC supervised MS/MS data analysis; GL provided reagents (antibodies against PfPKAr and PfPKAc),  
509 helped design experiments and analyze data and edited the manuscript; SS contributed reagents  
510 (antibodies to Pf14-3-3I, plasmid construct for production of recombinant Pf14-3-3I), helped design  
511 experiments and analyzed data; CC created the project, raised funds, designed experiments, analyzed  
512 data and edited the manuscript. All authors reviewed and commented on the manuscript.

513 **References**

- 514 1. Gaur D, Chitnis CE. 2011. Molecular interactions and signaling mechanisms during erythrocyte  
515 invasion by malaria parasites. *Curr Opin Microbiol* 14:422-8.
- 516 2. Sharma P, Chitnis CE. 2013. Key molecular events during host cell invasion by Apicomplexan  
517 pathogens. *Curr Opin Microbiol* 16:432-7.
- 518 3. Baker DA, Drought LG, Flueck C, Nofal SD, Patel A, Penzo M, Walker EM. 2017. Cyclic  
519 nucleotide signalling in malaria parasites. *Open Biol* 7(12).doi:10.1098/rsob.1-70213.
- 520 4. Dawn A, Singh S, More KR, Siddiqui FA, Pachikara N, Ramdani G, Langsley G, Chitnis CE.  
521 2014. The central role of cAMP in regulating Plasmodium falciparum merozoite invasion of  
522 human erythrocytes. *PLoS Pathog* 10:e1004520.
- 523 5. Singh S, Alam MM, Pal-Bhowmick I, Brzostowski JA, Chitnis CE. 2010. Distinct external  
524 signals trigger sequential release of apical organelles during erythrocyte invasion by malaria  
525 parasites. *PLoS Pathog* 6:e1000746.
- 526 6. Day EK, Sosale NG, Lazzara MJ. 2016. Cell signaling regulation by protein phosphorylation: a  
527 multivariate, heterogeneous, and context-dependent process. *Curr Opin Biotechnol* 40:185-192.
- 528 7. Ardito F, Giuliani M, Perrone D, Troiano G, Lo Muzio L. 2017. The crucial role of protein  
529 phosphorylation in cell signaling and its use as targeted therapy (Review). *Int J Mol Med*  
530 40:271-280.
- 531 8. Blonska M, Lin X. 2011. NF-kappaB signaling pathways regulated by CARMA family of  
532 scaffold proteins. *Cell Res* 21:55-70.
- 533 9. Agarwal-Mawal A, Qureshi HY, Cafferty PW, Yuan Z, Han D, Lin R, Paudel HK. 2003. 14-3-3  
534 connects glycogen synthase kinase-3 beta to tau within a brain microtubule-associated tau  
535 phosphorylation complex. *J Biol Chem* 278:12722-8.
- 536 10. Kawamoto N, Sasabe M, Endo M, Machida Y, Araki T. 2015. Calcium-dependent protein  
537 kinases responsible for the phosphorylation of a bZIP transcription factor FD crucial for the  
538 florigen complex formation. *Sci Rep* 5:8341.
- 539 11. Alam MM, Solyakov L, Bottrill AR, Flueck C, Siddiqui FA, Singh S, Mistry S, Viskaduraki M,  
540 Lee K, Hopp CS, Chitnis CE, Doerig C, Moon RW, Green JL, Holder AA, Baker DA, Tobin  
541 AB. 2015. Phosphoproteomics reveals malaria parasite Protein Kinase G as a signalling hub  
542 regulating egress and invasion. *Nat Commun* 6:7285.
- 543 12. Lasonder E, Green JL, Grainger M, Langsley G, Holder AA. 2015. Extensive differential  
544 protein phosphorylation as intraerythrocytic Plasmodium falciparum schizonts develop into  
545 extracellular invasive merozoites. *Proteomics* 15:2716-29.
- 546 13. Bansal A, Singh S, More KR, Hans D, Nangalia K, Yogavel M, Sharma A, Chitnis CE. 2013.  
547 Characterization of Plasmodium falciparum calcium-dependent protein kinase 1 (PfCDPK1)  
548 and its role in microneme secretion during erythrocyte invasion. *J Biol Chem* 288:1590-602.
- 549 14. Morrison DK. 2009. The 14-3-3 proteins: integrators of diverse signaling cues that impact cell  
550 fate and cancer development. *Trends Cell Biol* 19:16-23.
- 551 15. Mancini M, Corradi V, Petta S, Barbieri E, Manetti F, Botta M, Santucci MA. 2011. A new  
552 nonpeptidic inhibitor of 14-3-3 induces apoptotic cell death in chronic myeloid leukemia  
553 sensitive or resistant to imatinib. *J Pharmacol Exp Ther* 336:596-604
- 554 16. Ottmann C. 2013. Small-molecule modulators of 14-3-3 protein-protein interactions. *Bioorg*  
555 *Med Chem* 21:4058-62.



- 556 17. Kumar S, Kumar M, Ekka R, Dvorin JD, Paul AS, Madugundu AK, Gilberger T, Gowda H,  
557 Duraisingh MT, Keshava Prasad TS, Sharma P. 2017. PfCDPK1 mediated signaling in  
558 erythrocytic stages of *Plasmodium falciparum*. *Nat Commun* 8:63.
- 559 18. Robert-Paganin J, Robblee JP, Auguin D, Blake TCA, Bookwalter CS, Krementsova EB,  
560 Moussaoui D, Previs MJ, Jousset G, Baum J, Trybus KM, Houdusse A. 2019. *Plasmodium*  
561 myosin A drives parasite invasion by an atypical force generating mechanism. *Nat Commun*  
562 10:3286.
- 563 19. Lasonder E, Green JL, Camarda G, Talabani H, Holder AA, Langsley G, Alano P. 2012. The  
564 *Plasmodium falciparum* schizont phosphoproteome reveals extensive phosphatidylinositol and  
565 cAMP-protein kinase A signaling. *J Proteome Res* 11:5323-37.
- 566 20. Singh S, More KR, Chitnis CE. 2014. Role of calcineurin and actin dynamics in regulated  
567 secretion of microneme proteins in *Plasmodium falciparum* merozoites during erythrocyte  
568 invasion. *Cell Microbiol* 16:50-63.
- 569 21. Prowse CN, Lew J. 2001. Mechanism of activation of ERK2 by dual phosphorylation. *J Biol*  
570 *Chem* 276:99-103.
- 571 22. Bandje K, Naissant B, Bigey P, Lohezic M, Vayssieres M, Blaud M, Kermasson L, Lopez-  
572 Rubio JJ, Langsley G, Lavazec C, Deloron P, Merckx A. 2016. Characterization of an A-kinase  
573 anchoring protein-like suggests an alternative way of PKA anchoring in *Plasmodium*  
574 *falciparum*. *Malar J* 15:248.
- 575 23. Jain R, Dey P, Gupta S, Pati S, Bhattacharjee A, Munde M, Singh S. 2020. Interaction of 14-3-  
576 3I and CDPK1 mediates the growth of human malaria parasites. *bioRxiv*.  
577 doi:<https://doi.org/10.1101/2020.01.14.906479>
- 578 24. Collins CR, Hackett F, Strath M, Penzo M, Withers-Martinez C, Baker DA, Blackman MJ.  
579 2013. Malaria parasite cGMP-dependent protein kinase regulates blood stage merozoite  
580 secretory organelle discharge and egress. *PLoS Pathog* 9:e1003344.
- 581 25. Muslin AJ, Tanner JW, Allen PM, & Shaw AS. 1996. Interaction of 14-3-3 with signaling  
582 proteins is mediated by the recognition of phosphoserine. *Cell*, 84(6), 889-897.
- 583 26. Yaffe MB, Rittinger K, Volinia S, Caron PR, Aitken A, Leffers H, Pascarella S, Rinaldo S,  
584 Visconti S, Cantley LC. 1997. The structural basis for 14-3-3:phosphopeptide binding  
585 specificity. *Cell*, 91(7), 961-971.
- 586 27. Coblitz B, Wu M, Shikano S, & Li M. 2006. C-terminal binding: an expanded repertoire and  
587 function of 14-3-3 proteins. *FEBS Lett*, 580(6), 1531-1535.
- 588 28. Paiardini A, Aducci P, Cervoni L, Cutruzzola F, Di Lucente C, Janson G, . . . Camoni L. 2014.  
589 The phytotoxin fusicoccin differently regulates 14-3-3 proteins association to mode III targets.  
590 *IUBMB Life*, 66(1), 52-62.
- 591 29. Matta A, Siu KW, Ralhan R. 2012. 14-3-3 zeta as novel molecular target for cancer therapy.  
592 *Expert Opin Ther Targets* 16:515-23.
- 593 30. Trager W, & Jensen JB. 1976. Human malaria parasites in continuous culture. *Science*,  
594 193(4254), 673-675.
- 595 31. Villen J, Gygi SP. 2008. The SCX/IMAC enrichment approach for global phosphorylation  
596 analysis by mass spectrometry. *Nat Protoc* 3:1630-8.
- 597 32. Solyakov L, Halbert J, Alam MM, Semblat JP, Dorin-Semblat D, Reininger L, Bottrill AR,  
598 Mistry S, Abdi A, Fennell C, Holland Z, Demarta C, Bouza Y, Sicard A, Nivez MP,  
599 Eschenlauer S, Lama T, Thomas DC, Sharma P, Agarwal S, Kern S, Pradel G, Graciotti M,

- 600 Tobin AB, Doerig C. 2011. Global kinomic and phospho-proteomic analyses of the human  
601 malaria parasite *Plasmodium falciparum*. *Nat Commun* 2:565.
- 602 33. Rappsilber J, Mann M, & Ishihama Y. 2007. Protocol for micro-purification, enrichment, pre-  
603 fractionation and storage of peptides for proteomics using StageTips. *Nat Protoc*, 2(8), 1896-  
604 1906.
- 605 34. Weisser H, Wright JC, Mudge JM, Gutenbrunner P, & Choudhary JS. 2016. Flexible Data  
606 Analysis Pipeline for High-Confidence Proteogenomics. *J Proteome Res*, 15(12), 4686-4695.
- 607 35. Beausoleil SA, Villén J, Gerber SA, Rush J, Gygi SP. (2006) A probability-based approach for  
608 high-throughput protein phosphorylation analysis and site localization. *Nat Biotechnol*.  
609 Oct;24(10):1285-92.
- 610 36. Shannon P, Markiel A, Ozier O, Baliga NS, Wang JT, Ramage D, Amin N, Schwikowski B,  
611 Ideker T. 2003. Cytoscape: a software environment for integrated models of biomolecular  
612 interaction networks. *Genome Res* 13:2498-504.
- 613 37. Bader GD, Hogue CW. 2003. An automated method for finding molecular complexes in large  
614 protein interaction networks. *BMC Bioinformatics* 4:2.
- 615 38. Chou MF, Schwartz D. 2011. Biological sequence motif discovery using motif-x. *Curr. Protocs.*  
616 *Bio-informatics*. Chapter 13, Unit 13 15-24. Doi:10.1002/0471250953.b11315s35.
- 617 39. Schwartz D and Gygi SP 2005. An iterative statistical approach to the identification of protein  
618 phosphorylation motifs from large scale datasets. *Nat. Biotech*
- 619 40. Bei AK, Desimone TM, Badiane AS, Ahouidi AD, Dieye T, Ndiaye D, Sarr O, Ndir O, Mboup  
620 S, Duraisingh MT. 2010. A flow cytometry-based assay for measuring invasion of red blood  
621 cells by *Plasmodium falciparum*. *Am J Hematol* 85:234-7.
- 622 41. Perez-Riverol Y, Csordas A, Bai J, Bernal-Llinares M, Hewapathirana S, Kundu DJ, Inuganti  
623 A, Griss J, Mayer G, Eisenacher M, Pérez E, Uszkoreit J, Pfeuffer J, Sachsenberg T, Yilmaz S,  
624 Tiwary S, Cox J, Audain E, Walzer M, Jarnuczak AF, Ternent T, Brazma A, Vizcaíno JA.  
625 2019. The PRIDE database and related tools and resources in 2019: improving support for  
626 quantification data. *Nucleic Acids Res*. 47(D1):D442-D450.

628

629

630

631 **Table 1. Identification of PfCDPK1, PfPKAr, Pf14-3-3I and PfPKAc by mass spectrometry.** The  
632 complete list of proteins identified in the immunoprecipitates is reported in Supplementary Table S4.

| Protein detected in IP |              | Max<br>Quant<br>Score | IP with anti-PfPKAr |                             | IP with anti-PfCDPK1 |                             | IP with anti-Pf14-3-3I |                             |
|------------------------|--------------|-----------------------|---------------------|-----------------------------|----------------------|-----------------------------|------------------------|-----------------------------|
| protein ID             | Protein name |                       | Unique<br>peptides  | Sequence<br>coverage<br>[%] | Unique<br>peptides   | Sequence<br>coverage<br>[%] | Unique<br>peptides     | Sequence<br>coverage<br>[%] |
| PF3D7_0217500          | PfCDPK1      | 323.31                | 39                  | 62                          | 57                   | 66.6                        | 43                     | 66.4                        |
| PF3D7_1223100          | PfPKAr       | 323.31                | 36                  | 69.2                        | 49                   | 74.6                        | 34                     | 71.4                        |
| PF3D7_0818200          | Pf14-3-3I    | 323.31                | 20                  | 67.2                        | 19                   | 58.4                        | 20                     | 74                          |

633

634

635 **Figure Legends.**

636 **Figure 1. The phosphoproteome of *P. falciparum* merozoites: a.)** Venn diagram depicting overlap in  
637 phosphorylation sites and phosphorylated proteins between the published merozoite phosphoproteome  
638 (12) and this study. **b)** Signaling and invasion related proteins from clustered subnetwork 1 from  
639 merozoite interaction network of phosphorylated proteins using MCODE clustering algorithm. Protein  
640 interaction data were downloaded from STRING for phosphoproteins found in this study and  
641 visualized in Cytoscape. MCODE clustering algorithm was used for the generation of the subnetwork  
642 of highly interacting proteins and each cluster was analyzed to identify overrepresented molecular  
643 function categories. Interaction network of proteins corresponding to molecular function category,  
644 Invasion of host cells and signaling related proteins from MCODE cluster 1, is shown here. Invasion-  
645 related proteins are in green, while signaling related proteins are in pink.

646

647 **Figure 2. Signal-dependent changes in phosphoproteome of *P. falciparum* merozoites: a)** Fold-  
648 changes in abundance of phosphopeptides in merozoites in EC buffer with low  $K^+$  compared to IC  
649 buffer with high  $K^+$  were plotted against fold-changes of non-phosphopeptides. **b)** Fold-changes in  
650 phosphopeptides in merozoites in EC + BAPTA-AM (EC-BA) buffer compared to IC buffer plotted  
651 against fold-changes of non-phosphopeptides. p-values for fold change in phosphorylation (colour  
652 coded) were calculated, as compared to the changes in non-phosphorylated peptides for respective  
653 proteins. Key proteins and their phosphosites with significant alterations are shown. **c.)** Fold-changes in  
654 individual phosphorylations in EC compared with IC and EC-BA compared with IC for PfCDPK1. The  
655 grey area represents fold-change in abundance of non-phosphorylated peptides from the corresponding  
656 proteins. Phosphosites with significant changes in abundance lie outside the grey area and are denoted  
657 with triangles. Phosphorylation of Ser 28/34 and Ser 64 of PfCDPK1 was significantly higher in EC  
658 and EC-BA compared to IC. **d.)** Fold-changes in individual phosphorylations in EC compared with IC

659 and EC-BA compared with IC for PfPKAr. The grey area represents fold-change in abundance of non-  
660 phosphorylated peptides from the corresponding proteins. Phosphosites with significant changes in  
661 abundance lie outside the grey area and are denoted with triangles. Phosphorylation of PfPKAr on  
662 Ser113/Ser114 was significantly higher in EC buffer, but not EC-BA buffer, compared to IC buffer.

663

664 **Figure 3. Calcium-dependent interaction of PfPKAr with PfCDPK1 and Pf14-3-3I leads to**  
665 **formation of a multi-protein complex in *P. falciparum* merozoites:** a) PfPKAr was  
666 immunoprecipitated (IP) from merozoites in IC buffer mimicking intracellular ionic conditions with  
667 high K<sup>+</sup> (IC), EC buffer mimicking extracellular ionic conditions with low K<sup>+</sup>, or EC buffer with  
668 intracellular Ca<sup>2+</sup> chelator BAPTA-AM (EC-BA). The presence of PfCDPK1, Pf14-3-3I and PfPKAr in  
669 IPs was confirmed by western blotting. Graphs show the average intensity normalized with the protein  
670 immunoprecipitated for each condition from three independent experiments. A representative western  
671 blotting image from one of three independent experiments is shown. b) and c) show representative  
672 western blotting images for IPs with specific anti-Pf14-3-3I and anti-PfCDPK1 sera, respectively; with  
673 quantification of interaction partners from 3 independent experiments shown in bar graphs. Mean ±  
674 SEM are shown with n=3, \* indicates P < 0.05, \*\* indicates P < 0.005, \*\*\* indicates P < 0.0005 by t-  
675 test. NS, non-significant, P > 0.05.

676

677 **Figure 4. Analysis of assembly of multi-protein complexes with PfPKAr, PfCDPK1 and Pf14-3-3**  
678 **by gel filtration chromatography.** Lysates were prepared from merozoites in IC and EC buffers and  
679 fractionated using a Superdex 200 gel filtration column. Fractions were probed for the presence of  
680 PfCDPK1, Pf14-3-3I, and PfPKAr by western blotting. Representative blots are shown for one out of  
681 three independent experiments. Intensity for each lane (representing each fraction) was measured using

682 ImageJ software and the ratio of EC/IC was calculated. The graph represents the average of the EC/IC  
683 ratio for each protein from three independent experiments. Mean  $\pm$  SEM are shown for 3 independent  
684 experiments (n=3). \* indicates  $P < 0.05$ , \*\* indicates  $P < 0.005$ , \*\*\* indicates  $P < 0.0005$  by t-test.

685

686 **Figure 5. Inhibition of interaction between PfPKAr and Pf14-3-3I by a PfPKAr-derived**  
687 **phosphopeptide, P1, and small-molecule inhibitor, BV02, of Pf14-3-3I. a)** Binding of Pf14-3-3I  
688 with phosphopeptide P1 from PfPKAr. Phosphopeptide P1 (NDDGpSpSDG) based on amino acid  
689 sequence of calcium-dependent phosphosites on PfPKAr encompassing S113 and S114, non-  
690 phosphorylated control peptide P2 (NDDGSSDG) and peptide P3 (pSDNGpSGDD), a control  
691 phosphopeptide based on scrambled P1 sequence, were tested for binding to Pf14-3-3I. Peptides P1, P2  
692 and P3 were immobilized on agarose beads and allowed to interact with recombinant Pf14-3-3I. Bound  
693 recombinant Pf14-3-3I was detected in elutes by western blotting. Phosphopeptides AA and RA, which  
694 are known to bind 14-3-3 were used as positive controls. Control beads with no immobilized peptides  
695 were used as negative control. Plots show the average percentage binding calculated for binding of  
696 recombinant Pf14-3-3I to each peptide from 3 independent experiments. A representative western  
697 blotting image from one out of three independent experiments is shown. **b)** Peptide P1 inhibits binding  
698 of Pf14-3-3 to PfPKAr in merozoites. Merozoites were treated with 100  $\mu$ M P1, P2, P3, or RPMI.  
699 Merozoites were lysed and lysates were used for immunoprecipitation with anti-Pf14-3-3I sera.  
700 Presence of PfCDPK1 and PfPKAr in the immunoprecipitates was investigated by western blotting.  
701 Percent inhibition of binding of PfCDPK1 and PfPKAr with Pf14-3-3I was calculated. The plot shows  
702 average percent inhibition of binding for three independent experiments. P1 decreases binding of  
703 PfPKAr to Pf14-3-3I, but has no effect on PfCDPK1 binding to Pf14-3-3I. **c)** BV02, a small molecule  
704 inhibitor of 14-3-3 interactions with phosphopeptides, inhibits binding of Pf14-3-3I to PfCDPK1 and  
705 PfPKAr in merozoites. Merozoites were treated with 2  $\mu$ M BV02 or DMSO and lysed, lysates were

706 used for immunoprecipitation with specific anti-Pf14-3-3I serum. Presence of PfCDPK1 and PfPKAr  
707 in the immunoprecipitates was confirmed by western blotting. The plot shows the mean percent  
708 inhibition of binding ( $\pm$  SEM) for three independent experiments (n=3). \* indicates  $P < 0.05$ , \*\*  
709 indicates  $P < 0.005$ , \*\*\* indicates  $P < 0.0005$ , by t-test. NS, not significant ( $P > 0.05$ ).

710

711 **Figure 6. Inhibition of RBC invasion and microneme secretion by both PfPKAr-based**  
712 **phosphopeptide and Pf14-3-3I inhibitor. a)** Peptide P1 and BV02 both block RBC invasion by  
713 merozoites. *P. falciparum* merozoites were isolated and allowed to invade erythrocytes in the presence  
714 of increasing concentrations of peptides P1, P2 and P3 (10, 50 and 100  $\mu$ M) and increasing  
715 concentrations of BV02 (0.5, 1, 1.5 and 2  $\mu$ M). Newly invaded trophozoites were stained with SYBR  
716 green and scored by flow cytometry. Merozoites were allowed to invade erythrocytes in the absence of  
717 inhibitors using respective solvents as control. Percent invasion inhibition rates (Mean  $\pm$  SEM with  
718 n=3) in presence of inhibitors are shown. \*\* indicates  $P < 0.005$ , \*\*\* indicates  $P < 0.005$ , t-test. **b)**  
719 Phosphopeptide P1 (NDDGpSpSDG) derived from the amino sequence of 2 calcium-dependent  
720 phosphosites on PfPKAr encompassing S113 and S114, non-phosphorylated control peptide P2  
721 (NDDGSSDG) and peptide P3 (pSDNGpSGDD), a control phosphopeptide based on scrambled P1  
722 sequence, AA and RA, 2 phosphopeptides based on 14-3-3 substrate binding sites, and BV02, a small  
723 molecule 14-3-3 binding inhibitor were tested for inhibition of PfAMA1 secretion by merozoites.  
724 Secretion of PfAMA1 was significantly reduced upon treatment of merozoites with phosphopeptides  
725 P1, AA and RA, and by BV02. Cytoplasmic protein PfNAPL was detected in the supernatant and used  
726 as a control for merozoite lysis. PfNAPL was detected in merozoite pellet and used as a control for  
727 normalization. Western blotting image for one out of three independent experiments is shown. The plot  
728 shows the average percent inhibition of binding for three independent experiments. Mean  $\pm$  SEM are  
729 shown (n=3), \*\* indicates  $P < 0.005$  by t-test.

730 **Figure 7. Model for assembly of a signaling complex during RBC invasion by *P. falciparum***  
731 **merozoites.** Exposure of merozoites to a low K<sup>+</sup> ionic environment as found in blood plasma triggers a  
732 signaling cascade resulting in the phosphorylation of PfCDPK1 and PfPKAr. The scaffold protein  
733 Pf14-3-3I binds phosphorylated PfPKAr and PfCDPK1 leading to the formation of a high-molecular-  
734 weight multi-protein complex composed of PfCDPK1, PfPKAr, PfPKAc and Pf14-3-3. Formation of  
735 this signalling complex plays a regulatory role in secretion of microneme proteins and merozoite  
736 invasion of RBCs.

737



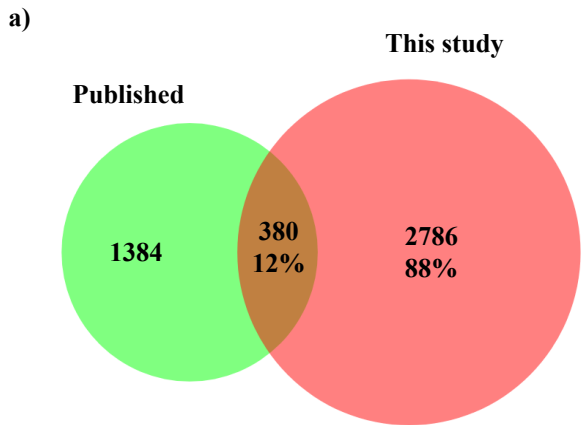

Phospho-peptide sites

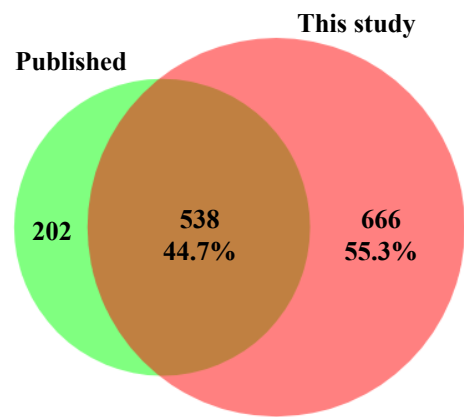

Phospho-proteins

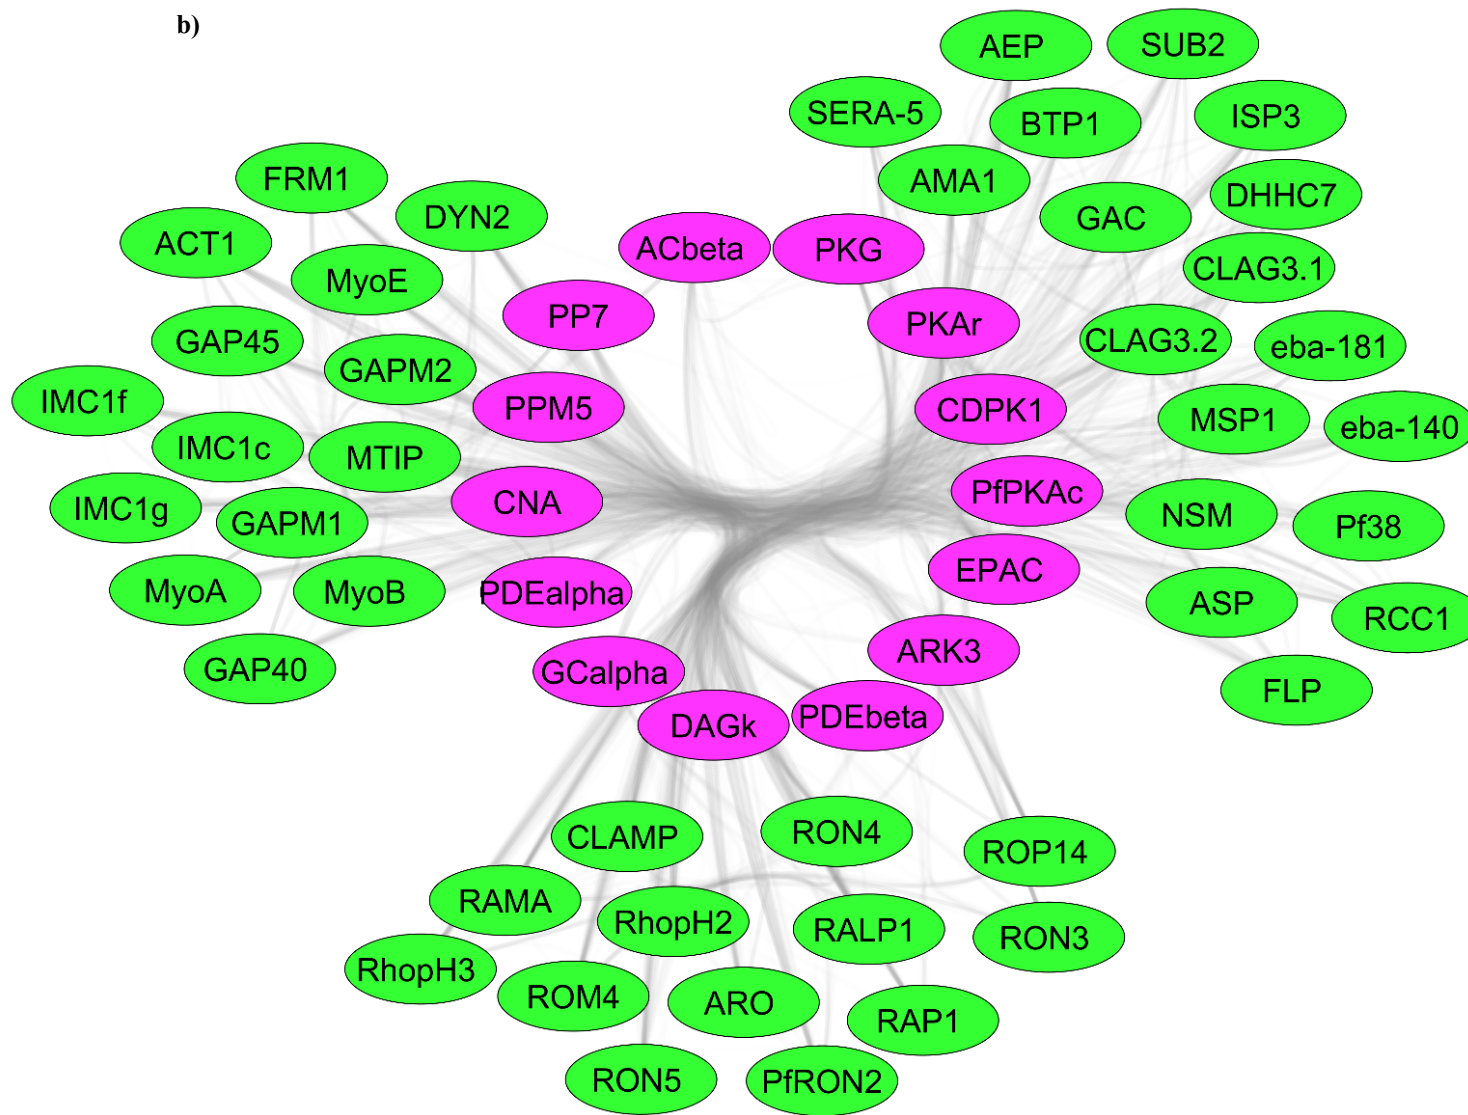

Figure 1

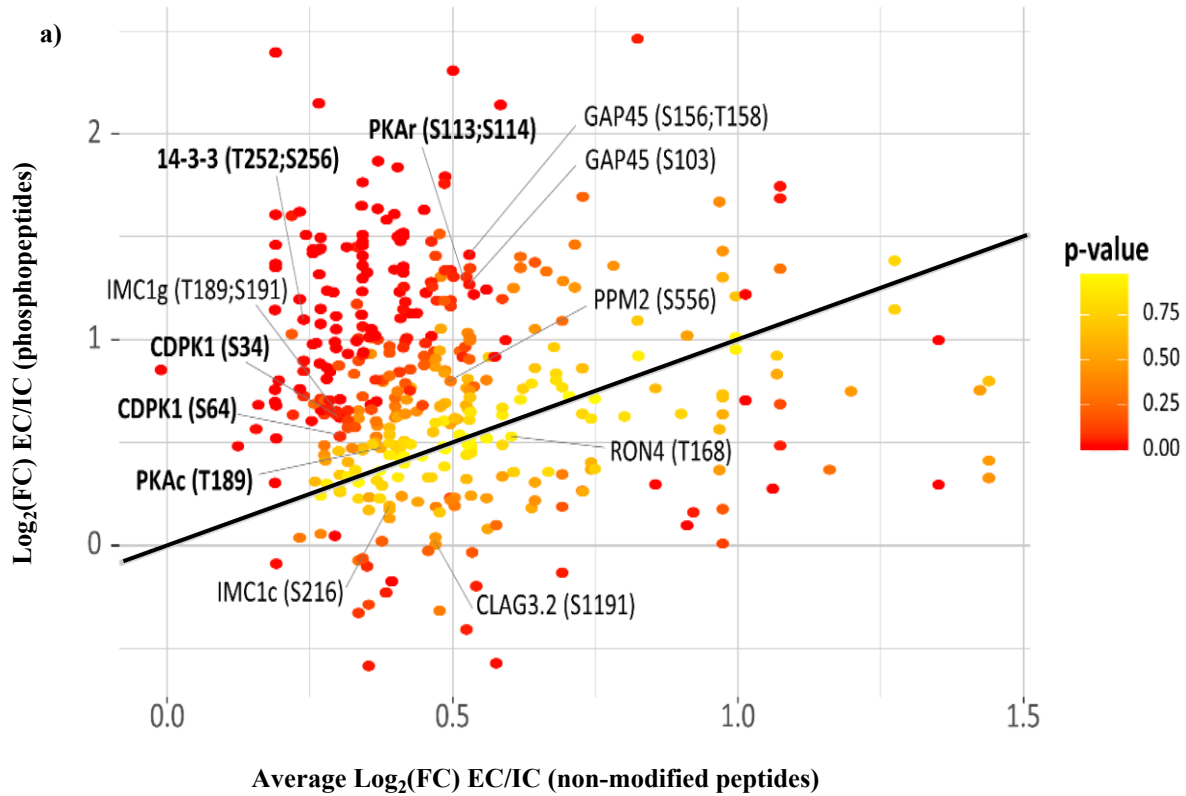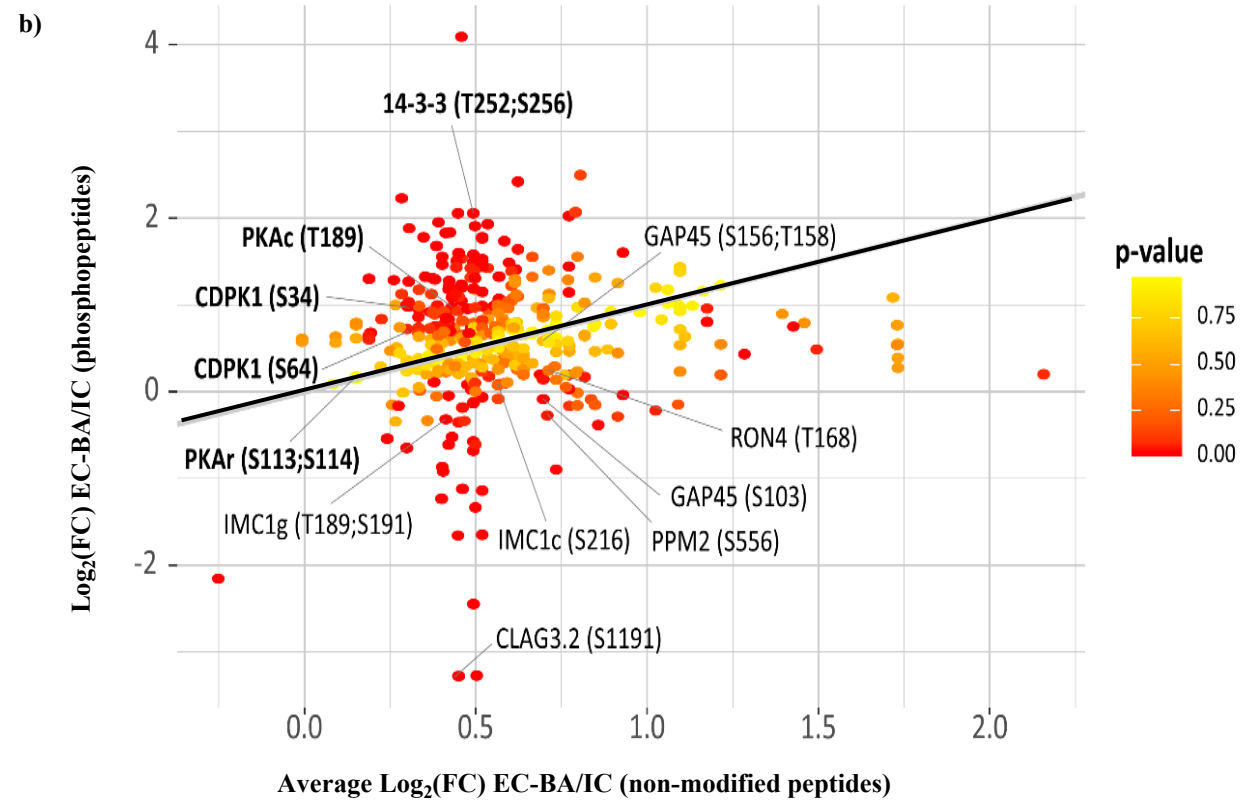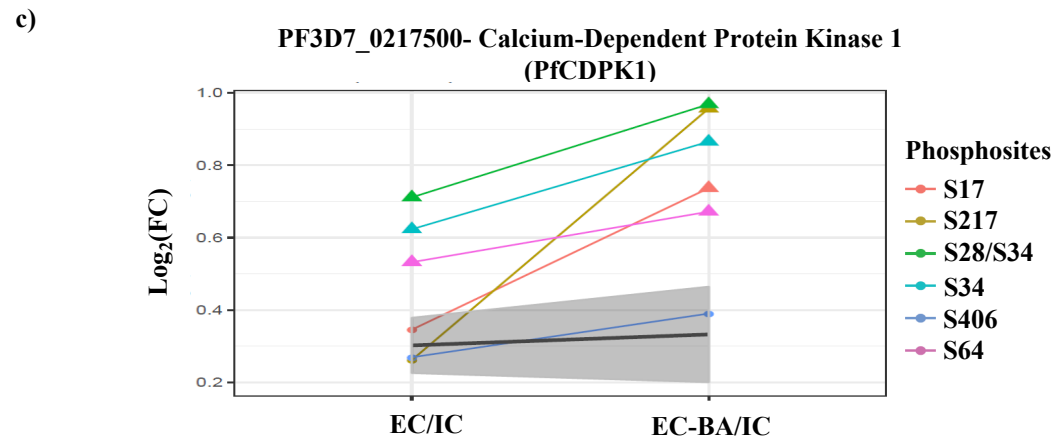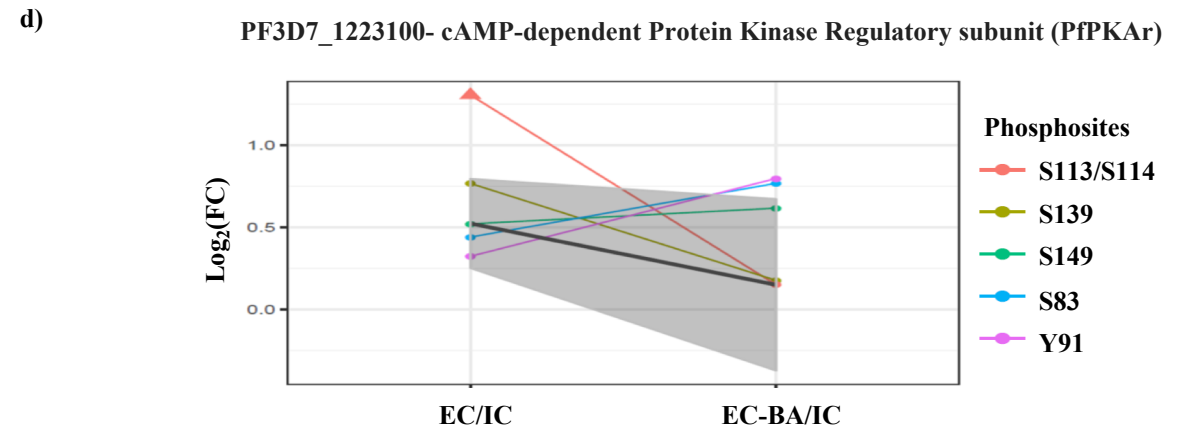

Figure 2

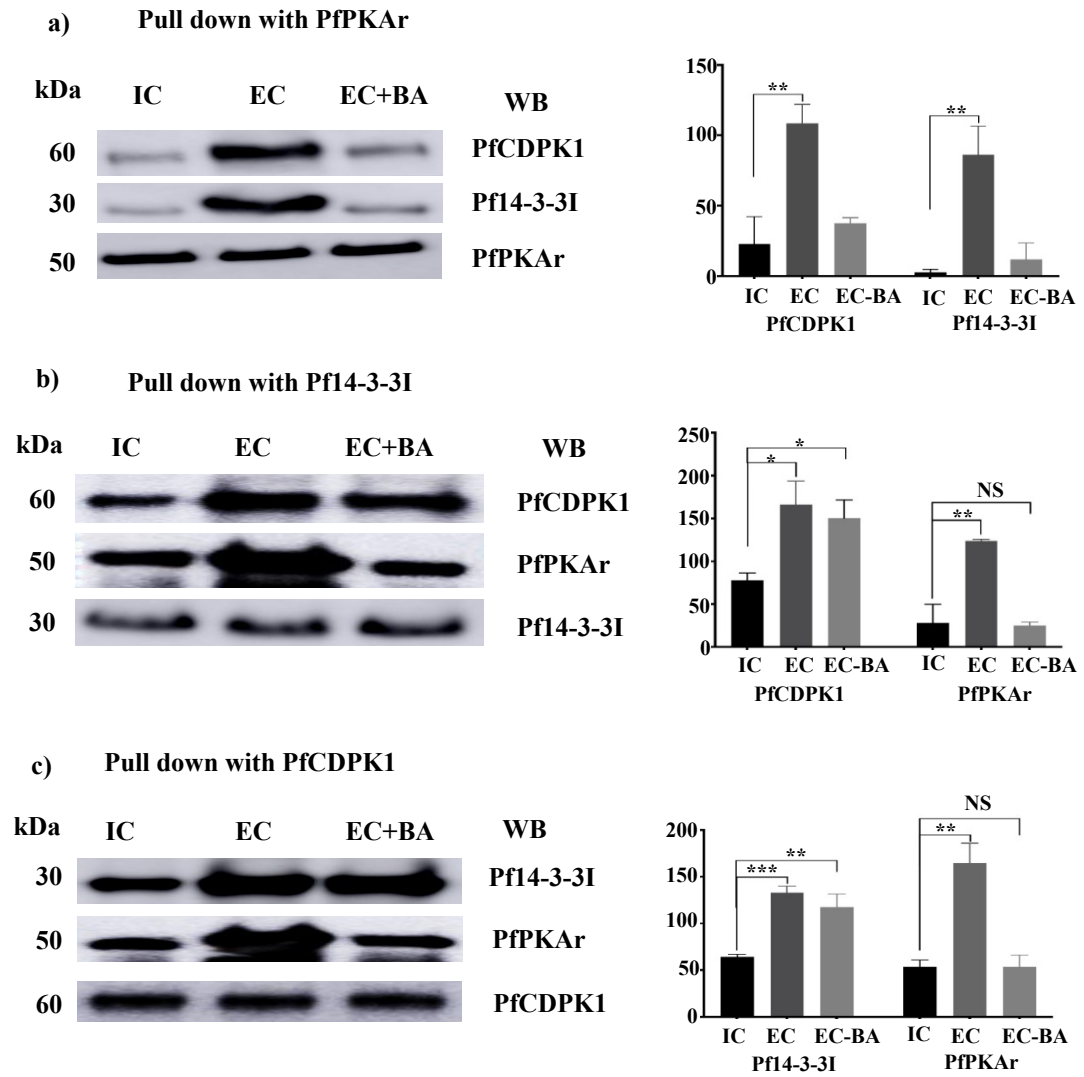

**Figure 3**

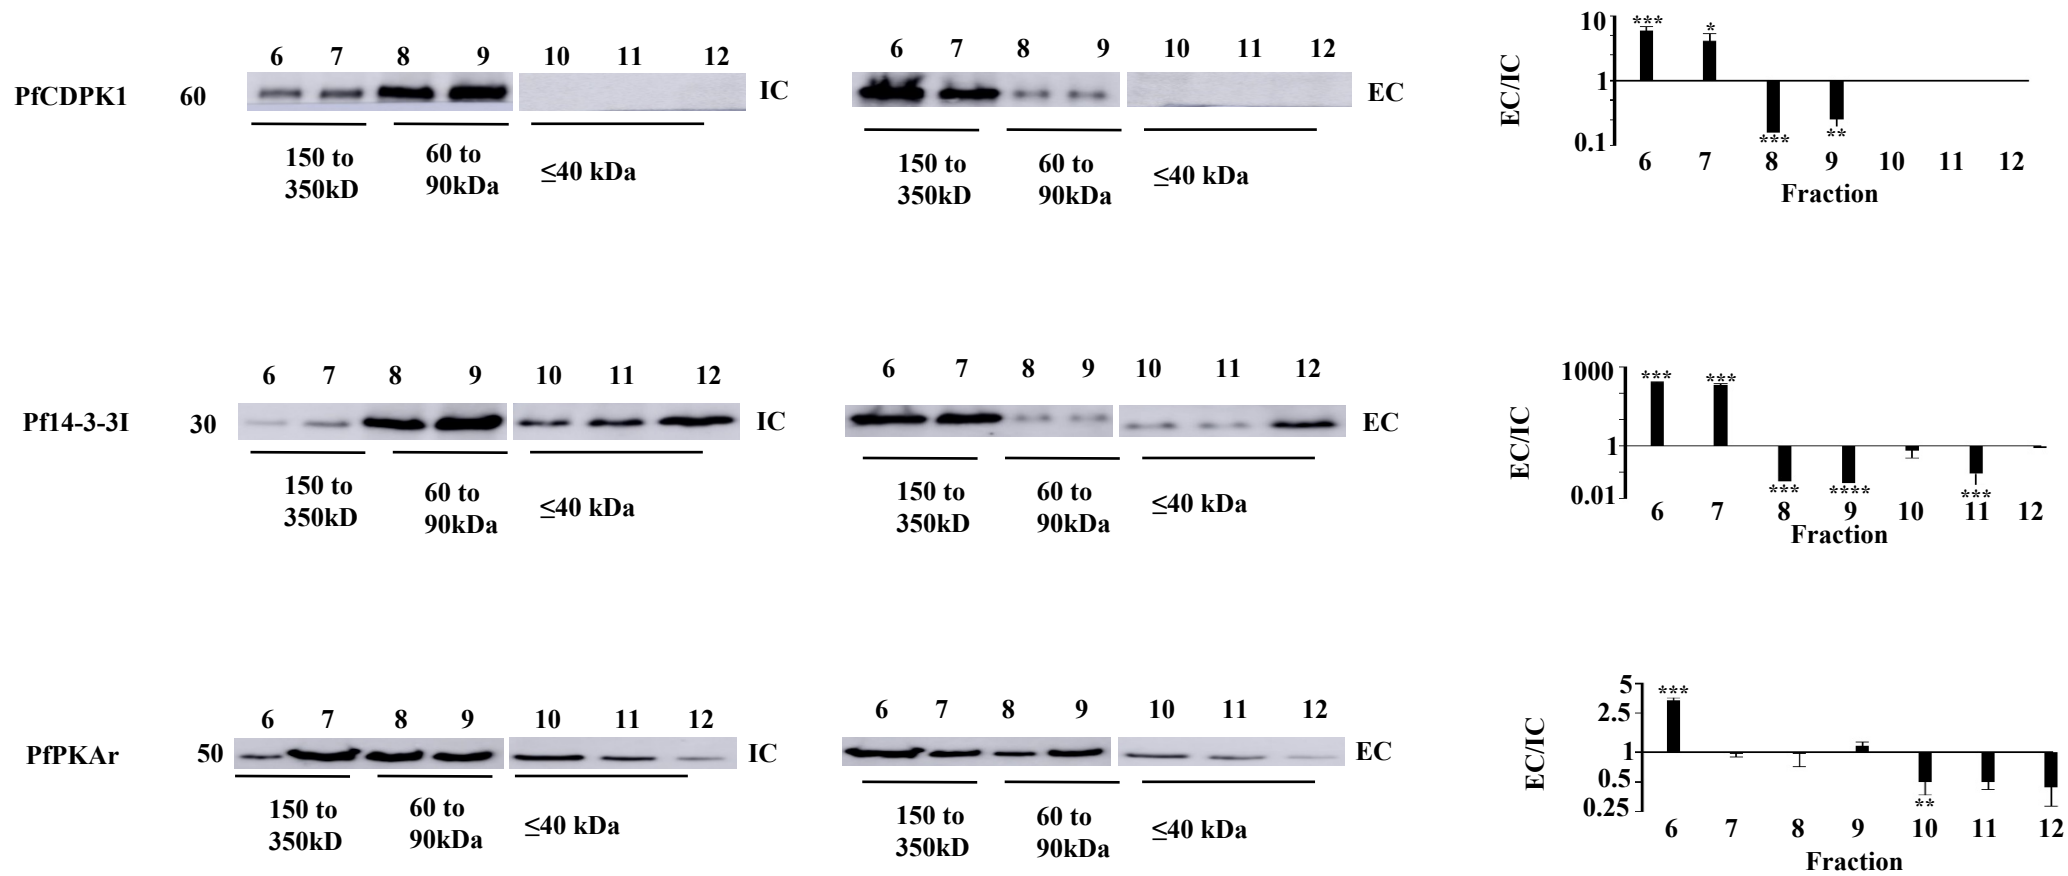

Figure 4

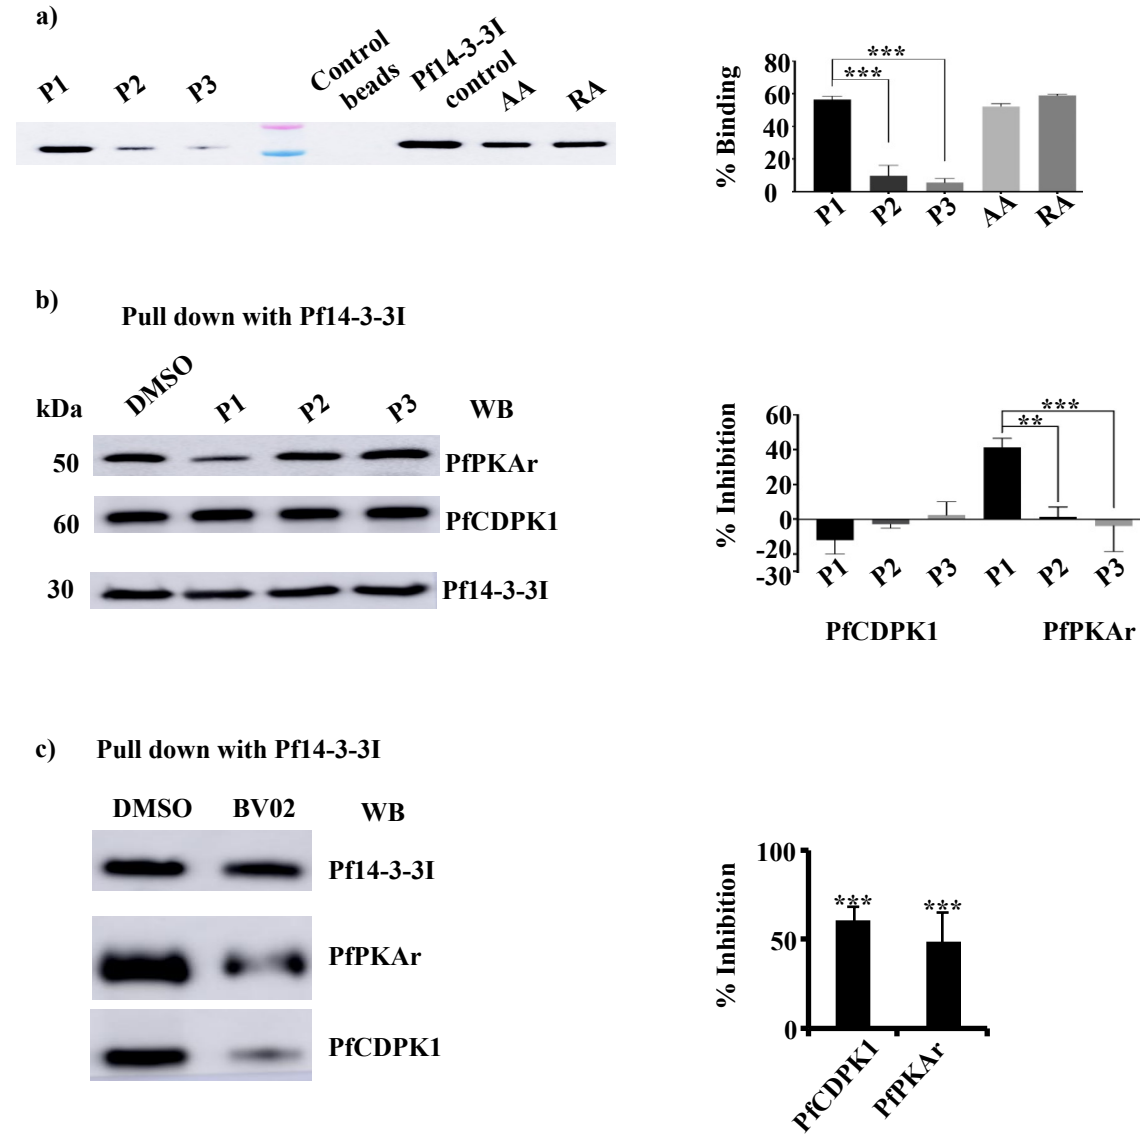

**Figure 5**

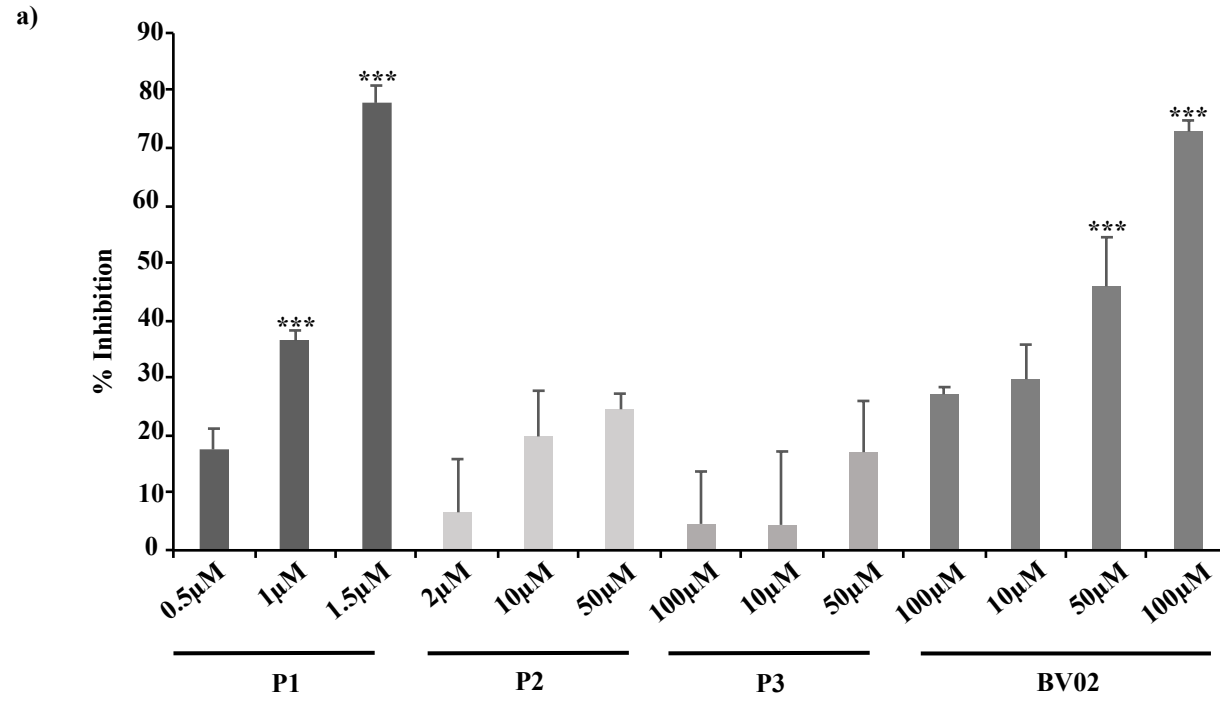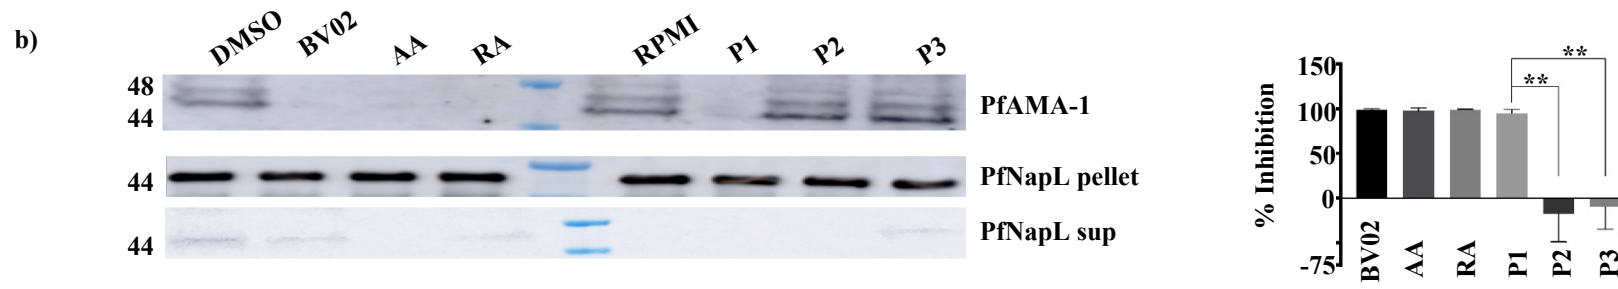

Figure 6

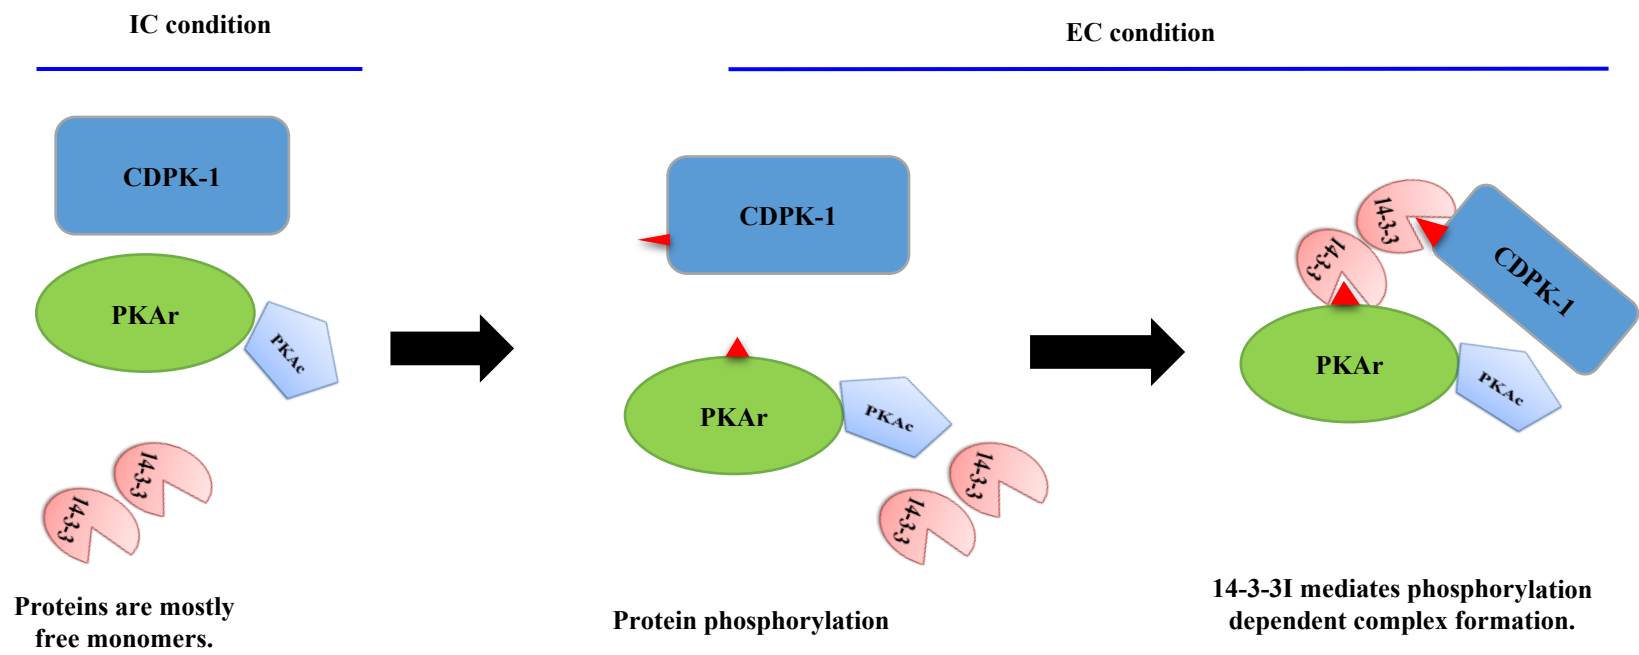

**Figure 7**
